# Supplementary material for: Reliability of Repeated Trials Protocols for Body Composition Assessment by Air Displacement Plethysmography
Source: Int J Environ Res Public Health. 2021 Oct 12;18(20):10693. doi: 10.3390/ijerph182010693 (PMC8535236; doi:10.3390/ijerph182010693)
Supplement: Supplementary file 1 [file ijerph-18-10693-s001.zip › ijerph-1346684-supplementary/ADPreptrials_Supplementary_Data_S1.xlsx]

## Sheet: Anonymized_Raw_Data
Test No.	Age	Gender	Height (cm)	Height (in)	ID 1	Ethnicity	Operator	Density Model	TGV Model	% Fat	% FFM	Fat Mass (kg)	Fat Mass (lb)	Fat Free Mass (kg)	Fat Free Mass (lb)	Body Mass (kg)	Body Mass (lb)	Est. RMR (kcal/day)	Est. TEE (kcal/day)	Activity Level	Body Volume	BD (kg/L)	Volume1 (L)	Volume2 (L)	Volume3 (L)	DFM (kg/L)	DFFM (kg/L)	TGV (L)	Predicted TGV (L)	BSA (cm^2)	Comments
1544	20	Female	164	64.6	2001	General Population	operator	Siri	Predicted	48.2	51.8	38.748	85.425	41.63	91.78	80.3788	177.205	1231	1871	Low Activity	80.9	0.9936	79.1504	78.8289	78.7166	0.9	1.1	3.134	3.134	18698.8
1545	20	Female	164	64.6	2001	General Population	operator	Siri	Predicted	49.3	50.7	39.661	87.437	40.716	89.762	80.3763	177.2	1211	1841	Low Activity	81.082	0.9913	78.964	78.9457		0.9	1.1	3.134	3.134	18698.5
1546	20	Female	164	64.6	2001	General Population	operator	Siri	Predicted	49.9	50.1	40.07	88.339	40.301	88.849	80.3714	177.189	1202	1827	Low Activity	81.16	0.9903	79.0403	79.026		0.9	1.1	3.134	3.134	18698.1
1547	20	Female	164	64.6	2001	General Population	operator	Siri	Predicted	50	50	40.145	88.505	40.225	88.68	80.3698	177.185	1200	1824	Low Activity	81.174	0.9901	79.136	78.9576		0.9	1.1	3.134	3.134	18697.9
1548	20	Female	164	64.6	2001	General Population	operator	Siri	Predicted	49.9	50.1	40.142	88.498	40.223	88.676	80.365	177.174	1200	1824	Low Activity	81.169	0.9901	78.9713	79.1124		0.9	1.1	3.134	3.134	18697.4
1549	20	Female	164	64.6	2001	General Population	operator	Siri	Predicted	49	51	39.416	86.897	41.027	90.449	80.4427	177.346	1218	1851	Low Activity	81.093	0.992	78.923	79.0079		0.9	1.1	3.134	3.134	18705.1
1550	23.53	Female	170.5	67.1	2002	General Population	operator	Siri	Predicted	23.1	76.9	12.332	27.187	41.026	90.447	53.3579	117.634	1108	1684	Low Activity	50.998	1.0463	48.8925	48.892		0.9	1.1	3.379	3.379	16159.4
1551	23.53	Female	170.5	67.1	2002	General Population	operator	Siri	Predicted	22.2	77.8	11.812	26.04	41.512	91.519	53.3239	117.559	1119	1701	Low Activity	50.862	1.0484	48.7528	48.7602		0.9	1.1	3.379	3.379	16155.1
1552	23.53	Female	170.5	67.1	2002	General Population	operator	Siri	Predicted	23.2	76.8	12.353	27.234	40.966	90.314	53.3191	117.548	1107	1683	Low Activity	50.968	1.0461	48.8939	48.6256	48.8292	0.9	1.1	3.379	3.379	16154.4
1553	23.53	Female	170.5	67.1	2002	General Population	operator	Siri	Predicted	19.5	80.5	10.37	22.861	42.944	94.676	53.314	117.537	1150	1748	Low Activity	50.562	1.0544	48.6718	48.4855	48.4269	0.9	1.1	3.379	3.379	16153.8
1554	23.53	Female	170.5	67.1	2002	General Population	operator	Siri	Predicted	21.4	78.6	11.424	25.186	41.883	92.336	53.3072	117.522	1127	1713	Low Activity	50.769	1.05	48.5957	48.7305		0.9	1.1	3.379	3.379	16152.9
1555	23.53	Female	170.5	67.1	2002	General Population	operator	Siri	Predicted	20.8	79.2	11.104	24.48	42.206	93.047	53.3097	117.528	1134	1724	Low Activity	50.707	1.0513	48.5708	48.7808	48.6305	0.9	1.1	3.379	3.379	16153.2
1556	24.54	Male	181	71.3	1001	General Population	operator	Siri	Predicted	36.2	63.8	40.353	88.964	71.031	156.597	111.385	245.561	1996	3014	Low Activity	109.411	1.018	107.464	106.684	106.724	0.9	1.1	4.074	4.074	23071.9
1557	24.54	Male	181	71.3	1001	General Population	operator	Siri	Predicted	37.5	62.5	41.814	92.184	69.57	153.376	111.384	245.56	1964	2966	Low Activity	109.706	1.0153	106.868	107.129		0.9	1.1	4.074	4.074	23071.9
1558	24.54	Male	181	71.3	1001	General Population	operator	Siri	Predicted	38	62	42.328	93.317	69.054	152.238	111.382	245.555	1953	2949	Low Activity	109.808	1.0143	107.149	107.052		0.9	1.1	4.074	4.074	23071.7
1559	24.54	Male	181	71.3	1001	General Population	operator	Siri	Predicted	37.7	62.3	42.016	92.63	69.319	152.822	111.335	245.452	1958	2957	Low Activity	109.702	1.0149	107.094	106.896		0.9	1.1	4.074	4.074	23067.6
1560	24.54	Male	181	71.3	1001	General Population	operator	Siri	Predicted	38.2	61.8	42.585	93.885	68.752	151.571	111.337	245.456	1946	2938	Low Activity	109.819	1.0138	106.955	107.268		0.9	1.1	4.074	4.074	23067.8
1561	24.54	Male	181	71.3	1001	General Population	operator	Siri	Predicted	38.6	61.4	43.019	94.841	68.306	150.588	111.325	245.429	1936	2923	Low Activity	109.895	1.013	107.123	107.253		0.9	1.1	4.074	4.074	23066.7
1562	24.41	Male	185	72.8	1002	General Population	operator	Siri	Predicted	23.2	76.8	19.241	42.419	63.718	140.475	82.9593	182.894	1722	2600	Low Activity	79.305	1.0461	76.6318	76.6365		0.9	1.1	4.262	4.262	20681.6
1563	24.41	Male	185	72.8	1002	General Population	operator	Siri	Predicted	21.8	78.2	18.1	39.905	64.85	142.97	82.9506	182.875	1746	2636	Low Activity	79.066	1.0491	76.4447	76.3469		0.9	1.1	4.262	4.262	20680.6
1564	24.41	Male	185	72.8	1002	General Population	operator	Siri	Predicted	23.1	76.9	19.128	42.171	63.807	140.671	82.9358	182.842	1724	2603	Low Activity	79.26	1.0464	76.6416	76.5386		0.9	1.1	4.262	4.262	20679.1
1565	24.41	Male	185	72.8	1002	General Population	operator	Siri	Predicted	20.6	79.4	17.057	37.604	65.876	145.233	82.9335	182.837	1769	2671	Low Activity	78.84	1.0519	75.7835	76.5557	79.2963	0.9	1.1	4.262	4.262	20678.8
1566	24.41	Male	185	72.8	1002	General Population	operator	Siri	Predicted	21	79	17.384	38.325	65.542	144.496	82.9262	182.821	1761	2659	Low Activity	78.899	1.051	76.232	76.2261		0.9	1.1	4.262	4.262	20678.1
1567	24.41	Male	185	72.8	1002	General Population	operator	Siri	Predicted	22.9	77.1	18.946	41.77	63.969	141.028	82.9158	182.798	1727	2608	Low Activity	79.206	1.0468	76.2507	76.6199	76.4506	0.9	1.1	4.262	4.262	20677
1568	24.03	Male	177	69.7	1003	General Population	operator	Siri	Predicted	13	87	8.442	18.612	56.62	124.825	65.0619	143.437	1495	2257	Low Activity	60.853	1.0692	58.2285	58.5044	58.4094	0.9	1.1	3.881	3.881	18063.9
1569	24.03	Male	177	69.7	1003	General Population	operator	Siri	Predicted	12.4	87.6	8.089	17.832	56.986	125.633	65.0747	143.465	1503	2270	Low Activity	60.793	1.0704	58.3551	58.4388		0.9	1.1	3.881	3.881	18065.4
1570	24.03	Male	177	69.7	1003	General Population	operator	Siri	Predicted	13	87	8.49	18.716	56.583	124.744	65.0725	143.46	1494	2256	Low Activity	60.872	1.069	58.4963	58.4556		0.9	1.1	3.881	3.881	18065.1
1571	24.03	Male	177	69.7	1003	General Population	operator	Siri	Predicted	12.7	87.3	8.257	18.203	56.813	125.251	65.0693	143.453	1499	2263	Low Activity	60.822	1.0698	58.3751	58.4768		0.9	1.1	3.881	3.881	18064.7
1572	24.03	Male	177	69.7	1003	General Population	operator	Siri	Predicted	13.5	86.5	8.766	19.325	56.297	124.114	65.0628	143.439	1488	2247	Low Activity	60.919	1.068	58.5479	58.4981		0.9	1.1	3.881	3.881	18064
1573	24.03	Male	177	69.7	1003	General Population	operator	Siri	Predicted	12.2	87.8	7.926	17.475	57.136	125.963	65.0625	143.438	1506	2274	Low Activity	60.749	1.071	58.3573	58.349		0.9	1.1	3.881	3.881	18063.9
1574	38.95	Male	163	64.2	2003	General Population	operator	Siri	Predicted	34	66	22.685	50.013	44.112	97.25	66.797	147.262	1230	1857	Low Activity	65.307	1.0228	63.1584	63.166		0.9	1.1	3.354	3.354	17207.8
1575	38.95	Male	163	64.2	2003	General Population	operator	Siri	Predicted	35	65	23.379	51.541	43.41	95.704	66.789	147.245	1214	1833	Low Activity	65.44	1.0206	63.0538	63.3169	63.2731	0.9	1.1	3.354	3.354	17206.9
1576	38.95	Male	163	64.2	2003	General Population	operator	Siri	Predicted	34.5	65.5	23.011	50.73	43.762	96.478	66.7724	147.208	1222	1845	Low Activity	65.351	1.0218	63.1465	63.2649		0.9	1.1	3.354	3.354	17205.1
1577	38.95	Male	163	64.2	2003	General Population	operator	Siri	Predicted	34.1	65.9	22.752	50.161	44.009	97.024	66.762	147.185	1227	1853	Low Activity	65.289	1.0226	63.0925	63.1957		0.9	1.1	3.354	3.354	17203.9
1578	38.95	Male	163	64.2	2003	General Population	operator	Siri	Predicted	34.8	65.2	23.236	51.227	43.52	95.944	66.7557	147.171	1217	1838	Low Activity	65.381	1.021	63.1634	63.3088		0.9	1.1	3.354	3.354	17203.2
1579	38.95	Male	163	64.2	2003	General Population	operator	Siri	Predicted	32.9	67.1	21.946	48.384	44.807	98.783	66.7536	147.166	1245	1880	Low Activity	65.119	1.0251	62.9142	63.0332		0.9	1.1	3.354	3.354	17203
1580	24.11	Male	184	72.4	1004	General Population	operator	Siri	Predicted	15	85	11.113	24.499	62.97	138.825	74.0828	163.325	1670	2522	Low Activity	69.593	1.0645	67.0459	66.9368		0.9	1.1	4.212	4.212	19633.1
1581	24.11	Male	184	72.4	1004	General Population	operator	Siri	Predicted	15.3	84.7	11.345	25.012	62.732	138.3	74.0773	163.313	1664	2513	Low Activity	69.635	1.0638	67.0004	67.0665		0.9	1.1	4.212	4.212	19632.5
1582	24.11	Male	184	72.4	1004	General Population	operator	Siri	Predicted	14.5	85.5	10.743	23.684	63.331	139.621	74.0739	163.305	1677	2532	Low Activity	69.51	1.0657	66.8677	66.9496		0.9	1.1	4.212	4.212	19632.1
1583	24.11	Male	184	72.4	1004	General Population	operator	Siri	Predicted	14.3	85.7	10.575	23.314	63.495	139.982	74.0698	163.296	1681	2538	Low Activity	69.473	1.0662	66.7831	66.959		0.9	1.1	4.212	4.212	19631.7
1584	24.11	Male	184	72.4	1004	General Population	operator	Siri	Predicted	15.2	84.8	11.232	24.762	62.834	138.526	74.0663	163.288	1667	2517	Low Activity	69.602	1.0641	67.0553	66.9458		0.9	1.1	4.212	4.212	19631.3
1585	24.11	Male	184	72.4	1004	General Population	operator	Siri	Predicted	15	85	11.086	24.439	62.978	138.842	74.0634	163.282	1670	2522	Low Activity	69.57	1.0646	66.9077	67.029		0.9	1.1	4.212	4.212	19630.9
1586	22.28	Male	174	68.5	1005	General Population	operator	Siri	Predicted	18.7	81.3	13.979	30.819	60.773	133.982	74.7523	164.801	1624	2452	Low Activity	70.781	1.0561	68.491	68.6969	68.3241	0.9	1.1	3.723	3.723	18925.8
1587	22.28	Male	174	68.5	1005	General Population	operator	Siri	Predicted	20.8	79.2	15.55	34.281	59.193	130.498	74.7428	164.78	1590	2401	Low Activity	71.089	1.0514	68.6412	68.7913		0.9	1.1	3.723	3.723	18924.8
1588	22.28	Male	174	68.5	1005	General Population	operator	Siri	Predicted	20.3	79.7	15.138	33.374	59.595	131.384	74.733	164.758	1599	2414	Low Activity	70.997	1.0526	68.6167	68.6317		0.9	1.1	3.723	3.723	18923.8
1589	22.28	Male	174	68.5	1005	General Population	operator	Siri	Predicted	20.7	79.3	15.473	34.112	59.265	130.656	74.7376	164.768	1592	2404	Low Activity	71.069	1.0516	68.6154	68.7767		0.9	1.1	3.723	3.723	18924.2
1590	22.28	Male	174	68.5	1005	General Population	operator	Siri	Predicted	21.2	78.8	15.856	34.956	58.874	129.795	74.7298	164.751	1583	2390	Low Activity	71.139	1.0505	68.7619	68.7708		0.9	1.1	3.723	3.723	18923.4
1591	22.28	Male	174	68.5	1005	General Population	operator	Siri	Predicted	20.9	79.1	15.654	34.512	59.071	130.229	74.7252	164.741	1587	2396	Low Activity	71.094	1.0511	68.7016	68.7414		0.9	1.1	3.723	3.723	18922.9
1592	25.36	Male	175	68.9	1006	General Population	operator	Siri	Predicted	13.3	86.7	10.022	22.094	65.143	143.615	75.1644	165.709	1721	2599	Low Activity	70.356	1.0683	67.9188	67.9752		0.9	1.1	3.798	3.798	19049.1
1593	25.36	Male	175	68.9	1006	General Population	operator	Siri	Predicted	13.4	86.6	10.097	22.261	65.06	143.433	75.1575	165.694	1719	2596	Low Activity	70.365	1.0681	67.8551	68.0569		0.9	1.1	3.798	3.798	19048.3
1594	25.36	Male	175	68.9	1006	General Population	operator	Siri	Predicted	13.5	86.5	10.118	22.306	65.036	143.379	75.1534	165.685	1719	2596	Low Activity	70.365	1.068	67.8956	68.0173		0.9	1.1	3.798	3.798	19047.9
1595	25.36	Male	175	68.9	1006	General Population	operator	Siri	Predicted	12.5	87.5	9.406	20.736	65.742	144.936	75.1475	165.672	1734	2618	Low Activity	70.216	1.0702	67.8123	67.8021		0.9	1.1	3.798	3.798	19047.3
1596	25.36	Male	175	68.9	1006	General Population	operator	Siri	Predicted	13	87	9.744	21.482	65.409	144.202	75.153	165.684	1727	2608	Low Activity	70.289	1.0692	67.8731	67.8881		0.9	1.1	3.798	3.798	19047.9
1597	25.36	Male	175	68.9	1006	General Population	operator	Siri	Predicted	13.4	86.6	10.048	22.151	65.1	143.52	75.1473	165.672	1720	2597	Low Activity	70.346	1.0683	67.9534	67.9201		0.9	1.1	3.798	3.798	19047.2
1604	25.61	Female	158	62.2	2004	General Population	operator	Siri	Predicted	25.2	74.8	13.526	29.82	40.168	88.555	53.6937	118.374	1091	1658	Low Activity	51.545	1.0417	49.6083	49.7014		0.9	1.1	2.935	2.935	15332.4
1605	25.61	Female	158	62.2	2004	General Population	operator	Siri	Predicted	24.6	75.4	13.199	29.1	40.484	89.253	53.6838	118.353	1098	1669	Low Activity	51.47	1.043	49.5618	49.5979		0.9	1.1	2.935	2.935	15331.2
1606	25.61	Female	158	62.2	2004	General Population	operator	Siri	Predicted	25.9	74.1	13.926	30.702	39.763	87.663	53.6895	118.365	1082	1645	Low Activity	51.622	1.0401	49.7174	49.7463		0.9	1.1	2.935	2.935	15331.9
1607	25.61	Female	158	62.2	2004	General Population	operator	Siri	Predicted	24.8	75.2	13.302	29.327	40.38	89.022	53.6822	118.349	1096	1666	Low Activity	51.489	1.0426	49.5586	49.7358	49.6399	0.9	1.1	2.935	2.935	15331
1608	25.61	Female	158	62.2	2004	General Population	operator	Siri	Predicted	25.1	74.9	13.45	29.652	40.227	88.684	53.6765	118.336	1092	1660	Low Activity	51.514	1.042	49.5838	49.7686	49.664	0.9	1.1	2.935	2.935	15330.3
1609	25.61	Female	158	62.2	2004	General Population	operator	Siri	Predicted	25.9	74.1	13.917	30.683	39.754	87.643	53.6716	118.326	1082	1645	Low Activity	51.604	1.0401	49.7005	49.7273		0.9	1.1	2.935	2.935	15329.7
1610	25.39	Male	175	68.9	1007	General Population	operator	Siri	Predicted	13.8	86.2	10.396	22.918	64.923	143.13	75.3184	166.049	1717	2593	Low Activity	70.571	1.0673	68.1487	68.1744		0.9	1.1	3.799	3.799	19065.7
1611	25.39	Male	175	68.9	1007	General Population	operator	Siri	Predicted	13.8	86.2	10.422	22.976	64.892	143.063	75.3142	166.039	1716	2591	Low Activity	70.573	1.0672	68.1817	68.1447		0.9	1.1	3.799	3.799	19065.2
1612	25.39	Male	175	68.9	1007	General Population	operator	Siri	Predicted	13.6	86.4	10.257	22.613	65.058	143.428	75.3149	166.041	1720	2597	Low Activity	70.54	1.0677	68.0955	68.1654		0.9	1.1	3.799	3.799	19065.3
1613	25.39	Male	175	68.9	1007	General Population	operator	Siri	Predicted	13.6	86.4	10.242	22.579	65.066	143.447	75.3081	166.026	1720	2597	Low Activity	70.531	1.0677	68.1079	68.1345		0.9	1.1	3.799	3.799	19064.5
1614	25.39	Male	175	68.9	1007	General Population	operator	Siri	Predicted	14.7	85.3	11.063	24.391	64.242	141.63	75.3058	166.021	1702	2570	Low Activity	70.695	1.0652	68.3062	68.2641		0.9	1.1	3.799	3.799	19064.3
1615	25.39	Male	175	68.9	1007	General Population	operator	Siri	Predicted	13.9	86.1	10.449	23.036	64.851	142.973	75.3002	166.008	1715	2590	Low Activity	70.566	1.0671	67.965	68.2163	68.0955	0.9	1.1	3.799	3.799	19063.7
1616	24.45	Male	185.5	73	1008	General Population	operator	Siri	Predicted	2.4	97.6	2.007	4.424	80.613	177.72	82.6193	182.144	2088	3633	Active	75.514	1.0941	73.1919	72.9406	72.7265	0.9	1.1	4.286	4.286	20685.9
1617	24.45	Male	185.5	73	1008	General Population	operator	Siri	Predicted	4.5	95.5	3.718	8.198	78.878	173.897	82.5968	182.095	2050	3567	Active	75.839	1.0891	73.2323	73.0857		0.9	1.1	4.286	4.286	20683.5
1618	24.45	Male	185.5	73	1008	General Population	operator	Siri	Predicted	3.3	96.7	2.754	6.07	79.84	176.018	82.5937	182.088	2071	3604	Active	75.641	1.0919	73.2677	73.0023	72.9202	0.9	1.1	4.286	4.286	20683.2
1619	24.45	Male	185.5	73	1008	General Population	operator	Siri	Predicted	3.1	96.9	2.524	5.564	80.058	176.498	82.582	182.062	2076	3612	Active	75.584	1.0926	73.4161	72.9896	72.819	0.9	1.1	4.286	4.286	20682
1620	24.45	Male	185.5	73	1008	General Population	operator	Siri	Predicted	3.8	96.2	3.116	6.869	79.457	175.174	82.5731	182.042	2063	3590	Active	75.696	1.0909	73.0537	72.6884	72.9779	0.9	1.1	4.286	4.286	20681
1621	24.45	Male	185.5	73	1008	General Population	operator	Siri	Predicted	5.3	94.7	4.348	9.585	78.216	172.437	82.5637	182.022	2036	3543	Active	75.936	1.0873	73.2675	73.2448		0.9	1.1	4.286	4.286	20680
1622	24.2	Male	174	68.5	1009	General Population	operator	Siri	Predicted	3.1	96.9	2.099	4.628	66.053	145.623	68.1527	150.251	1713	2981	Active	62.381	1.0925	59.9984	60.0717		0.9	1.1	3.741	3.741	18196.8
1623	24.2	Male	174	68.5	1009	General Population	operator	Siri	Predicted	3.3	96.7	2.238	4.935	65.896	145.277	68.1347	150.211	1709	2974	Active	62.393	1.092	60.4027	60.0181	60.0757	0.9	1.1	3.741	3.741	18194.8
1624	24.2	Male	174	68.5	1009	General Population	operator	Siri	Predicted	5.8	94.2	3.93	8.664	64.197	141.53	68.127	150.194	1672	2909	Active	62.728	1.0861	60.4746	60.2887	60.0828	0.9	1.1	3.741	3.741	18193.9
1625	24.2	Male	174	68.5	1009	General Population	operator	Siri	Predicted	5.9	94.1	4.029	8.882	64.087	141.288	68.1159	150.17	1670	2906	Active	62.737	1.0857	60.4615	60.3217		0.9	1.1	3.741	3.741	18192.6
1626	24.2	Male	174	68.5	1009	General Population	operator	Siri	Predicted	6	94	4.065	8.962	64.04	141.185	68.1055	150.147	1669	2904	Active	62.735	1.0856	60.2225	60.4247	60.3544	0.9	1.1	3.741	3.741	18191.4
1627	24.2	Male	174	68.5	1009	General Population	operator	Siri	Predicted	4.8	95.2	3.298	7.271	64.809	142.879	68.107	150.15	1685	2932	Active	62.582	1.0883	60.2713	60.2006		0.9	1.1	3.741	3.741	18191.6
1628	24.19	Female	167	65.7	2005	General Population	operator	Siri	Predicted	28.8	71.2	17.011	37.503	42.031	92.664	59.0426	130.167	1153	1753	Low Activity	57.112	1.0338	55.0828	54.9844		0.9	1.1	3.255	3.255	16618.1
1629	24.19	Female	167	65.7	2005	General Population	operator	Siri	Predicted	28.1	71.9	16.597	36.59	42.437	93.557	59.0336	130.147	1162	1766	Low Activity	57.02	1.0353	54.8721	55.0114		0.9	1.1	3.255	3.255	16617
1630	24.19	Female	167	65.7	2005	General Population	operator	Siri	Predicted	29.2	70.8	17.264	38.061	41.763	92.071	59.0266	130.131	1147	1743	Low Activity	57.148	1.0329	54.822	55.0674	55.073	0.9	1.1	3.255	3.255	16616.2
1631	24.19	Female	167	65.7	2005	General Population	operator	Siri	Predicted	28	72	16.517	36.413	42.502	93.701	59.0188	130.114	1163	1768	Low Activity	56.99	1.0356	54.8914	54.9331		0.9	1.1	3.255	3.255	16615.2
1632	24.19	Female	167	65.7	2005	General Population	operator	Siri	Predicted	29.9	70.1	17.617	38.838	41.4	91.272	59.0168	130.11	1139	1731	Low Activity	57.211	1.0316	55.1888	55.0764		0.9	1.1	3.255	3.255	16615
1633	24.19	Female	167	65.7	2005	General Population	operator	Siri	Predicted	29.2	70.8	17.224	37.973	41.79	92.131	59.0142	130.104	1148	1745	Low Activity	57.129	1.033	55.0846	55.0176		0.9	1.1	3.255	3.255	16614.7
1634	24.37	Male	180	70.9	1010	General Population	operator	Siri	Predicted	2.9	97.1	1.642	3.62	55.831	123.085	57.4724	126.705	1447	2185	Low Activity	52.579	1.0931	50.0877	50.2305		0.9	1.1	4.025	4.025	17346.4
1635	24.37	Male	180	70.9	1010	General Population	operator	Siri	Predicted	6.6	93.4	3.8	8.377	53.662	118.304	57.4614	126.681	1400	2114	Low Activity	53.005	1.0841	50.2873	50.5624	50.6077	0.9	1.1	4.025	4.025	17345
1636	24.37	Male	180	70.9	1010	General Population	operator	Siri	Predicted	6.3	93.7	3.593	7.921	53.855	118.731	57.4483	126.652	1404	2120	Low Activity	52.952	1.0849	50.1952	50.5808	50.4822	0.9	1.1	4.025	4.025	17343.3
1637	24.37	Male	180	70.9	1010	General Population	operator	Siri	Predicted	5.9	94.1	3.415	7.53	54.025	119.105	57.4405	126.635	1408	2126	Low Activity	52.909	1.0857	50.5484	50.4288		0.9	1.1	4.025	4.025	17342.3
1638	24.37	Male	180	70.9	1010	General Population	operator	Siri	Predicted	6.4	93.6	3.694	8.144	53.745	118.487	57.439	126.631	1402	2117	Low Activity	52.964	1.0845	50.4754	50.6117		0.9	1.1	4.025	4.025	17342.1
1639	24.37	Male	180	70.9	1010	General Population	operator	Siri	Predicted	5.4	94.6	3.087	6.805	54.338	119.795	57.4247	126.6	1414	2135	Low Activity	52.828	1.087	50.3636	50.4522		0.9	1.1	4.025	4.025	17340.3
1640	20.86	Female	160	63	2006	General Population	operator	Siri	Predicted	23.8	76.2	13.487	29.733	43.209	95.259	56.6955	124.992	1169	1777	Low Activity	54.266	1.0448	52.3582	52.3006		0.9	1.1	2.993	2.993	15834.8
1641	20.86	Female	160	63	2006	General Population	operator	Siri	Predicted	22.4	77.6	12.71	28.02	43.981	96.961	56.6902	124.981	1186	1803	Low Activity	54.104	1.0478	52.1289	52.471	52.2064	0.9	1.1	2.993	2.993	15834.1
1642	20.86	Female	160	63	2006	General Population	operator	Siri	Predicted	25	75	14.169	31.238	42.517	93.735	56.6869	124.973	1154	1754	Low Activity	54.396	1.0421	52.5246	52.3945		0.9	1.1	2.993	2.993	15833.7
1643	20.86	Female	160	63	2006	General Population	operator	Siri	Predicted	25	75	14.152	31.2	42.53	93.764	56.6825	124.963	1154	1754	Low Activity	54.389	1.0422	52.2744	52.4532	52.4509	0.9	1.1	2.993	2.993	15833.2
1644	20.86	Female	160	63	2006	General Population	operator	Siri	Predicted	25.2	74.8	14.304	31.535	42.371	93.411	56.6745	124.946	1151	1750	Low Activity	54.412	1.0416	52.5014	52.4498		0.9	1.1	2.993	2.993	15832.3
1646	20.86	Female	160	63	2006	General Population	operator	Siri	Predicted	25	75	14.193	31.29	42.479	93.651	56.6723	124.941	1153	1753	Low Activity	54.387	1.042	52.5154	52.3867		0.9	1.1	2.993	2.993	15832
1647	23.52	Male	180.5	71.1	1011	General Population	operator	Siri	Predicted	23.1	76.9	20.082	44.274	67.02	147.753	87.1019	192.027	1810	2733	Low Activity	83.241	1.0464	80.5529	80.758		0.9	1.1	4.041	4.041	20740.7
1648	23.52	Male	180.5	71.1	1011	General Population	operator	Siri	Predicted	23	77	20.042	44.185	67.049	147.818	87.0914	192.004	1811	2735	Low Activity	83.223	1.0465	80.5658	80.7099		0.9	1.1	4.041	4.041	20739.7
1649	23.52	Male	180.5	71.1	1011	General Population	operator	Siri	Predicted	23.4	76.6	20.372	44.912	66.707	147.063	87.0785	191.975	1803	2723	Low Activity	83.278	1.0456	80.7378	80.6479		0.9	1.1	4.041	4.041	20738.4
1650	23.52	Male	180.5	71.1	1011	General Population	operator	Siri	Predicted	22	78	19.134	42.184	67.939	149.78	87.0731	191.963	1830	2763	Low Activity	83.023	1.0488	80.3882	80.4876		0.9	1.1	4.041	4.041	20737.8
1651	23.52	Male	180.5	71.1	1011	General Population	operator	Siri	Predicted	22.8	77.2	19.838	43.734	67.228	148.212	87.0652	191.946	1815	2741	Low Activity	83.158	1.047	80.6407	80.5051		0.9	1.1	4.041	4.041	20737
1652	23.52	Male	180.5	71.1	1011	General Population	operator	Siri	Predicted	21.6	78.4	18.805	41.457	68.255	150.477	87.0599	191.934	1837	2774	Low Activity	82.944	1.0496	80.2856	80.4331		0.9	1.1	4.041	4.041	20736.5
1653	23.88	Male	186	73.2	1012	General Population	operator	Siri	Predicted	25.7	74.3	22.82	50.31	66.038	145.589	88.8581	195.899	1796	2712	Low Activity	85.39	1.0406	82.6267	82.7139		0.9	1.1	4.304	4.304	21377.6
1654	23.88	Male	186	73.2	1012	General Population	operator	Siri	Predicted	25.4	74.6	22.56	49.736	66.294	146.154	88.8542	195.89	1802	2721	Low Activity	85.334	1.0413	82.5869	82.6413		0.9	1.1	4.304	4.304	21377.2
1655	23.88	Male	186	73.2	1012	General Population	operator	Siri	Predicted	25.5	74.5	22.621	49.871	66.224	145.998	88.8446	195.869	1800	2718	Low Activity	85.338	1.0411	82.5867	82.8598	82.6488	0.9	1.1	4.304	4.304	21376.2
1656	23.88	Male	186	73.2	1012	General Population	operator	Siri	Predicted	25.8	74.2	22.893	50.47	65.944	145.381	88.8368	195.852	1794	2709	Low Activity	85.386	1.0404	82.5442	82.7871		0.9	1.1	4.304	4.304	21375.4
1657	23.88	Male	186	73.2	1012	General Population	operator	Siri	Predicted	25.7	74.3	22.855	50.386	65.96	145.416	88.8146	195.803	1794	2709	Low Activity	85.358	1.0405	82.6705	82.6054		0.9	1.1	4.304	4.304	21373.2
1658	23.88	Male	186	73.2	1012	General Population	operator	Siri	Predicted	25.9	74.1	22.966	50.632	65.844	145.161	88.8102	195.793	1792	2706	Low Activity	85.376	1.0402	82.6595	82.6533		0.9	1.1	4.304	4.304	21372.7
1659	23.12	Male	175	68.9	1013	General Population	operator	Siri	Predicted	10.7	89.3	8.327	18.359	69.511	153.246	77.8388	171.605	1827	2759	Low Activity	72.445	1.0745	70.0748	69.9866		0.9	1.1	3.778	3.778	19334.2
1660	23.12	Male	175	68.9	1013	General Population	operator	Siri	Predicted	10.4	89.6	8.084	17.823	69.738	153.747	77.8226	171.57	1832	2766	Low Activity	72.381	1.0752	69.97	69.9639		0.9	1.1	3.778	3.778	19332.5
1661	23.12	Male	175	68.9	1013	General Population	operator	Siri	Predicted	10.5	89.5	8.204	18.088	69.608	153.458	77.812	171.546	1829	2762	Low Activity	72.396	1.0748	69.9738	69.9895		0.9	1.1	3.778	3.778	19331.4
1662	23.12	Male	175	68.9	1013	General Population	operator	Siri	Predicted	10	90	7.752	17.091	70.037	154.404	77.7888	171.495	1838	2775	Low Activity	72.283	1.0762	69.929	69.8097		0.9	1.1	3.778	3.778	19329
1663	23.12	Male	175	68.9	1013	General Population	operator	Siri	Predicted	11	89	8.569	18.891	69.207	152.576	77.776	171.467	1820	2748	Low Activity	72.437	1.0737	70.0406	70.0049		0.9	1.1	3.778	3.778	19327.6
1664	23.12	Male	175	68.9	1013	General Population	operator	Siri	Predicted	10.6	89.4	8.263	18.218	69.505	153.232	77.7681	171.449	1827	2759	Low Activity	72.368	1.0746	70.0528	69.8549		0.9	1.1	3.778	3.778	19326.8
1665	24.54	Male	180	70.9	1014	General Population	operator	Siri	Predicted	10.9	89.1	8.166	18.003	66.752	147.163	74.9182	165.166	1755	2650	Low Activity	69.757	1.074	66.9692	67.3139	67.1657	0.9	1.1	4.027	4.027	19415.1
1666	24.54	Male	180	70.9	1014	General Population	operator	Siri	Predicted	7.9	92.1	5.886	12.976	69.014	152.15	74.9	165.126	1804	2724	Low Activity	69.28	1.0811	66.7436	66.7817		0.9	1.1	4.027	4.027	19413
1667	24.54	Male	180	70.9	1014	General Population	operator	Siri	Predicted	9.5	90.5	7.116	15.689	67.764	149.394	74.88	165.082	1777	2683	Low Activity	69.51	1.0772	66.9868	66.9995		0.9	1.1	4.027	4.027	19410.8
1668	24.54	Male	180	70.9	1014	General Population	operator	Siri	Predicted	8.2	91.8	6.135	13.526	68.731	151.525	74.8661	165.052	1798	2715	Low Activity	69.3	1.0803	66.79	66.7748		0.9	1.1	4.027	4.027	19409.3
1669	24.54	Male	180	70.9	1014	General Population	operator	Siri	Predicted	10.1	89.9	7.584	16.72	67.269	148.302	74.853	165.023	1766	2667	Low Activity	69.58	1.0758	67.0623	67.0641		0.9	1.1	4.027	4.027	19407.9
1670	24.54	Male	180	70.9	1014	General Population	operator	Siri	Predicted	9	91	6.747	14.874	68.064	150.055	74.8107	164.929	1783	2692	Low Activity	69.373	1.0784	66.9282	66.7835		0.9	1.1	4.027	4.027	19403.2
1671	24.16	Male	184	72.4	1015	General Population	operator	Siri	Predicted	11.5	88.5	8.59	18.939	65.802	145.07	74.3929	164.008	1732	2615	Low Activity	69.365	1.0725	67.0405	66.7529	66.7709	0.9	1.1	4.212	4.212	19668
1672	24.16	Male	184	72.4	1015	General Population	operator	Siri	Predicted	12.5	87.5	9.28	20.459	65.093	143.505	74.3731	163.965	1717	2593	Low Activity	69.487	1.0703	66.8865	66.8803		0.9	1.1	4.212	4.212	19665.8
1673	24.16	Male	184	72.4	1015	General Population	operator	Siri	Predicted	13.3	86.7	9.866	21.751	64.493	142.183	74.359	163.934	1704	2573	Low Activity	69.592	1.0685	66.9724	67.0056		0.9	1.1	4.212	4.212	19664.2
1674	24.16	Male	184	72.4	1015	General Population	operator	Siri	Predicted	14	86	10.414	22.958	63.932	140.945	74.3454	163.904	1692	2555	Low Activity	69.69	1.0668	67.0842	67.0904		0.9	1.1	4.212	4.212	19662.7
1675	24.16	Male	184	72.4	1015	General Population	operator	Siri	Predicted	14.3	85.7	10.608	23.386	63.73	140.501	74.3381	163.887	1687	2547	Low Activity	69.723	1.0662	67.1703	67.0695		0.9	1.1	4.212	4.212	19661.8
1676	24.16	Male	184	72.4	1015	General Population	operator	Siri	Predicted	13.7	86.3	10.177	22.437	64.16	141.448	74.3369	163.885	1696	2561	Low Activity	69.635	1.0675	67.0563	67.0075		0.9	1.1	4.212	4.212	19661.7
1677	25.08	Male	192	75.6	1016	General Population	operator	Siri	Predicted	6.5	93.5	5.087	11.215	72.865	160.639	77.9515	171.854	1900	2869	Low Activity	71.893	1.0843	69.0018	69.1726		0.9	1.1	4.598	4.598	20691.2
1678	25.08	Male	192	75.6	1016	General Population	operator	Siri	Predicted	5.2	94.8	4.079	8.992	73.877	162.87	77.9554	171.862	1922	2902	Low Activity	71.692	1.0874	68.916	68.8578		0.9	1.1	4.598	4.598	20691.6
1679	25.08	Male	192	75.6	1016	General Population	operator	Siri	Predicted	6.5	93.5	5.083	11.207	72.863	160.635	77.9458	171.841	1900	2869	Low Activity	71.887	1.0843	69.1268	69.0357		0.9	1.1	4.598	4.598	20690.5
1680	25.08	Male	192	75.6	1016	General Population	operator	Siri	Predicted	7.7	92.3	6.036	13.306	71.903	158.52	77.939	171.826	1879	2837	Low Activity	72.073	1.0814	68.8856	69.3061	69.229	0.9	1.1	4.598	4.598	20689.8
1681	25.08	Male	192	75.6	1016	General Population	operator	Siri	Predicted	6.5	93.5	5.055	11.145	72.882	160.676	77.9369	171.821	1901	2871	Low Activity	71.873	1.0844	69.002	69.1331		0.9	1.1	4.598	4.598	20689.5
1682	25.08	Male	192	75.6	1016	General Population	operator	Siri	Predicted	6.1	93.9	4.728	10.424	73.199	161.377	77.9277	171.801	1908	2881	Low Activity	71.799	1.0854	69.1097	69.3912	68.8766	0.9	1.1	4.598	4.598	20688.5
1683	23.98	Male	187	73.6	1017	General Population	operator	Siri	Predicted	7.2	92.8	4.739	10.449	61.033	134.555	65.7725	145.004	1594	2407	Low Activity	60.751	1.0827	58.1633	58.0924		0.9	1.1	4.352	4.352	18885.1
1684	23.98	Male	187	73.6	1017	General Population	operator	Siri	Predicted	7	93	4.617	10.179	61.15	134.812	65.7668	144.991	1596	2410	Low Activity	60.721	1.0831	58.1006	58.0955		0.9	1.1	4.352	4.352	18884.5
1685	23.98	Male	187	73.6	1017	General Population	operator	Siri	Predicted	7.5	92.5	4.902	10.807	60.862	134.177	65.7637	144.984	1590	2401	Low Activity	60.775	1.0821	58.1262	58.1793		0.9	1.1	4.352	4.352	18884.1
1686	23.98	Male	187	73.6	1017	General Population	operator	Siri	Predicted	7.6	92.4	5.009	11.043	60.75	133.932	65.7594	144.975	1588	2398	Low Activity	60.793	1.0817	58.1581	58.1828		0.9	1.1	4.352	4.352	18883.5
1687	23.98	Male	187	73.6	1017	General Population	operator	Siri	Predicted	6.6	93.4	4.345	9.578	61.405	135.376	65.7501	144.954	1602	2419	Low Activity	60.65	1.0841	57.9651	58.0905		0.9	1.1	4.352	4.352	18882.4
1688	23.98	Male	187	73.6	1017	General Population	operator	Siri	Predicted	6.2	93.8	4.09	9.017	61.66	135.937	65.7499	144.954	1607	2427	Low Activity	60.599	1.085	57.916	58.0364		0.9	1.1	4.352	4.352	18882.4
1689	24.42	Female	155	61	2007	General Population	operator	Siri	Predicted	23.6	76.4	11.656	25.697	37.706	83.127	49.3617	108.824	1020	1550	Low Activity	47.229	1.0452	45.4353	45.4011		0.9	1.1	2.824	2.824	14589.7
1690	24.42	Female	155	61	2007	General Population	operator	Siri	Predicted	22.6	77.4	11.144	24.568	38.215	84.249	49.3585	108.817	1031	1567	Low Activity	47.123	1.0474	45.2878	45.3358		0.9	1.1	2.824	2.824	14589.3
1691	24.42	Female	155	61	2007	General Population	operator	Siri	Predicted	22.6	77.4	11.17	24.626	38.181	84.174	49.3509	108.8	1030	1566	Low Activity	47.121	1.0473	45.289	45.4504	45.3315	0.9	1.1	2.824	2.824	14588.4
1692	24.42	Female	155	61	2007	General Population	operator	Siri	Predicted	23.6	76.4	11.628	25.635	37.721	83.161	49.349	108.796	1020	1550	Low Activity	47.212	1.0453	45.3897	45.4124		0.9	1.1	2.824	2.824	14588.1
1693	24.42	Female	155	61	2007	General Population	operator	Siri	Predicted	24.3	75.7	11.983	26.417	37.361	82.368	49.344	108.785	1012	1538	Low Activity	47.279	1.0437	45.4439	45.4924		0.9	1.1	2.824	2.824	14587.5
1694	24.42	Female	155	61	2007	General Population	operator	Siri	Predicted	23.5	76.5	11.581	25.531	37.76	83.247	49.3409	108.778	1021	1552	Low Activity	47.195	1.0455	45.3776	45.3907		0.9	1.1	2.824	2.824	14587.1
1695	53.02	Female	162	63.8	2008	General Population	operator	Siri	Predicted	44.2	55.8	32.743	72.186	41.381	91.23	74.1242	163.416	1200	1824	Low Activity	74	1.0017	71.946	71.8509		0.9	1.1	3.164	3.164	17906
1696	53.02	Female	162	63.8	2008	General Population	operator	Siri	Predicted	43	57	31.876	70.275	42.233	93.109	74.1096	163.384	1218	1851	Low Activity	73.812	1.004	71.7926	71.6278		0.9	1.1	3.164	3.164	17904.5
1697	53.02	Female	162	63.8	2008	General Population	operator	Siri	Predicted	45	55	33.333	73.486	40.775	89.893	74.1076	163.379	1187	1804	Low Activity	74.104	1	71.9526	72.0525		0.9	1.1	3.164	3.164	17904.3
1698	53.02	Female	162	63.8	2008	General Population	operator	Siri	Predicted	44.8	55.2	33.226	73.251	40.88	90.125	74.1061	163.376	1189	1807	Low Activity	74.082	1.0003	72.0122	71.9471		0.9	1.1	3.164	3.164	17904.1
1699	53.02	Female	162	63.8	2008	General Population	operator	Siri	Predicted	44.8	55.2	33.202	73.197	40.897	90.162	74.0985	163.359	1189	1807	Low Activity	74.07	1.0004	72.0219	71.9137		0.9	1.1	3.164	3.164	17903.3
1700	53.02	Female	162	63.8	2008	General Population	operator	Siri	Predicted	44.5	55.5	32.974	72.695	41.123	90.661	74.0968	163.356	1194	1815	Low Activity	74.022	1.001	71.8567	71.9839		0.9	1.1	3.164	3.164	17903.2
1701	50.59	Female	157	61.8	2009	General Population	operator	Siri	Predicted	32.7	67.3	17.615	38.835	36.293	80.012	53.9083	118.847	1008	1754	Active	52.566	1.0255	50.5864	50.7366		0.9	1.1	2.977	2.977	15287.9
1702	50.59	Female	157	61.8	2009	General Population	operator	Siri	Predicted	33.8	66.2	18.207	40.138	35.709	78.726	53.9159	118.864	995	1512	Low Activity	52.693	1.0232	50.7694	50.8063		0.9	1.1	2.977	2.977	15288.8
1703	50.59	Female	157	61.8	2009	General Population	operator	Siri	Predicted	33.2	66.8	17.9	39.464	36.006	79.38	53.9065	118.844	1001	1522	Low Activity	52.622	1.0244	50.7441	50.691		0.9	1.1	2.977	2.977	15287.7
1704	50.59	Female	157	61.8	2009	General Population	operator	Siri	Predicted	33.1	66.9	17.827	39.302	36.077	79.537	53.9044	118.839	1003	1525	Low Activity	52.605	1.0247	50.645	50.7566		0.9	1.1	2.977	2.977	15287.4
1705	50.59	Female	157	61.8	2009	General Population	operator	Siri	Predicted	35	65	18.859	41.578	35.045	77.261	53.9045	118.839	980	1490	Low Activity	52.814	1.0206	50.8402	50.9785		0.9	1.1	2.977	2.977	15287.4
1706	50.59	Female	157	61.8	2009	General Population	operator	Siri	Predicted	33.3	66.7	17.912	39.49	35.918	79.186	53.8305	118.676	999	1518	Low Activity	52.556	1.0243	50.6467	50.6559		0.9	1.1	2.977	2.977	15278.5
1707	42	Male	178	70.1	1018	General Population	operator	Siri	Predicted	24.2	75.8	20.016	44.127	62.708	138.247	82.7236	182.374	1699	2565	Low Activity	79.247	1.0439	76.6547	76.6912		0.9	1.1	4.09	4.09	20086.9
1708	42	Male	178	70.1	1018	General Population	operator	Siri	Predicted	27.7	72.3	22.91	50.508	59.823	131.887	82.733	182.395	1636	2470	Low Activity	79.84	1.0362	77.2678	77.2646		0.9	1.1	4.09	4.09	20087.9
1709	42	Male	178	70.1	1018	General Population	operator	Siri	Predicted	28.3	71.7	23.445	51.687	59.282	130.693	82.7263	182.38	1624	2452	Low Activity	79.942	1.0348	77.2907	77.4455		0.9	1.1	4.09	4.09	20087.2
1710	42	Male	178	70.1	1018	General Population	operator	Siri	Predicted	27.4	72.6	22.685	50.012	60.033	132.351	82.7181	182.362	1641	2478	Low Activity	79.781	1.0368	77.2555	77.159		0.9	1.1	4.09	4.09	20086.4
1711	42	Male	178	70.1	1018	General Population	operator	Siri	Predicted	26.5	73.5	21.882	48.241	60.833	134.114	82.7147	182.355	1658	2504	Low Activity	79.616	1.0389	77.0574	77.0263		0.9	1.1	4.09	4.09	20086
1712	42	Male	178	70.1	1018	General Population	operator	Siri	Predicted	27.1	72.9	22.432	49.454	60.279	132.892	82.711	182.346	1646	2485	Low Activity	79.724	1.0375	77.1964	77.103		0.9	1.1	4.09	4.09	20085.6
1714	54.92	Male	170	66.9	1019	General Population	operator	Siri	Predicted	30.9	69.1	23.175	51.091	51.727	114.039	74.9018	165.13	1428	2156	Low Activity	72.774	1.0292	70.4095	70.3369		0.9	1.1	3.828	3.828	18625.2
1715	54.92	Male	170	66.9	1019	General Population	operator	Siri	Predicted	32.3	67.7	24.184	53.317	50.711	111.798	74.895	165.115	1406	2123	Low Activity	72.972	1.0264	70.6492	70.4928		0.9	1.1	3.828	3.828	18624.5
1716	54.92	Male	170	66.9	1019	General Population	operator	Siri	Predicted	32.2	67.8	24.148	53.238	50.742	111.866	74.8902	165.105	1407	2125	Low Activity	72.96	1.0264	70.5782	70.5406		0.9	1.1	3.828	3.828	18624
1717	54.92	Male	170	66.9	1019	General Population	operator	Siri	Predicted	31.7	68.3	23.756	52.374	51.133	112.729	74.8893	165.103	1415	2137	Low Activity	72.88	1.0276	70.5419	70.4169		0.9	1.1	3.828	3.828	18623.9
1718	54.92	Male	170	66.9	1019	General Population	operator	Siri	Predicted	31.6	68.4	23.662	52.166	51.224	112.93	74.8865	165.096	1417	2140	Low Activity	72.859	1.0278	70.4459	70.4698		0.9	1.1	3.828	3.828	18623.6
1719	54.92	Male	170	66.9	1019	General Population	operator	Siri	Predicted	32.2	67.8	24.094	53.118	50.789	111.971	74.8833	165.089	1408	2126	Low Activity	72.943	1.0266	70.4742	70.6102		0.9	1.1	3.828	3.828	18623.3
1720	24.47	Female	156	61.4	2010	General Population	operator	Siri	Predicted	27.8	72.2	11.907	26.25	30.988	68.317	42.8951	94.5675	848	1289	Low Activity	41.401	1.0361	39.5544	39.6699		0.9	1.1	2.86	2.86	13808.8
1721	24.47	Female	156	61.4	2010	General Population	operator	Siri	Predicted	26.7	73.3	11.444	25.231	31.449	69.334	42.8937	94.5645	858	1304	Low Activity	41.306	1.0384	39.455	39.58		0.9	1.1	2.86	2.86	13808.6
1722	24.47	Female	156	61.4	2010	General Population	operator	Siri	Predicted	27.6	72.4	11.855	26.136	31.037	68.424	42.8917	94.5601	849	1290	Low Activity	41.387	1.0363	39.4112	39.6118	39.5855	0.9	1.1	2.86	2.86	13808.3
1723	24.47	Female	156	61.4	2010	General Population	operator	Siri	Predicted	26.1	73.9	11.21	24.713	31.679	69.84	42.8885	94.553	863	1312	Low Activity	41.254	1.0396	39.4031	39.5277		0.9	1.1	2.86	2.86	13807.9
1724	24.47	Female	156	61.4	2010	General Population	operator	Siri	Predicted	25.6	74.4	10.986	24.219	31.9	70.327	42.8854	94.5461	867	1318	Low Activity	41.206	1.0408	39.3607	39.4739		0.9	1.1	2.86	2.86	13807.4
1725	24.47	Female	156	61.4	2010	General Population	operator	Siri	Predicted	26.8	73.2	11.512	25.38	31.372	69.164	42.8843	94.5438	856	1301	Low Activity	41.311	1.0381	39.468	39.5773		0.9	1.1	2.86	2.86	13807.3
1726	56.01	Female	149.2	58.7	2011	General Population	operator	Siri	Predicted	43.8	56.2	30.286	66.769	38.84	85.627	69.1258	152.396	1124	1708	Low Activity	68.96	1.0024	67.0955	67.1248		0.9	1.1	2.713	2.713	16375.5
1727	56.01	Female	149.2	58.7	2011	General Population	operator	Siri	Predicted	44.8	55.2	30.98	68.3	38.137	84.077	69.1172	152.377	1109	1686	Low Activity	69.092	1.0004	67.2012	67.2841		0.9	1.1	2.713	2.713	16374.7
1728	56.01	Female	149.2	58.7	2011	General Population	operator	Siri	Predicted	44.4	55.6	30.695	67.671	38.418	84.696	69.1126	152.367	1115	1695	Low Activity	69.031	1.0012	67.1592	67.2025		0.9	1.1	2.713	2.713	16374.2
1729	56.01	Female	149.2	58.7	2011	General Population	operator	Siri	Predicted	44.4	55.6	30.676	67.629	38.432	84.728	69.108	152.357	1115	1695	Low Activity	69.023	1.0012	67.1239	67.2218		0.9	1.1	2.713	2.713	16373.8
1730	56.01	Female	149.2	58.7	2011	General Population	operator	Siri	Predicted	45.4	54.6	31.348	69.111	37.761	83.249	69.1096	152.361	1101	1674	Low Activity	69.16	0.9993	67.3557	67.2645		0.9	1.1	2.713	2.713	16373.9
1731	56.01	Female	149.2	58.7	2011	General Population	operator	Siri	Predicted	43.3	56.7	29.928	65.981	39.173	86.361	69.1009	152.341	1132	1721	Low Activity	68.865	1.0034	67.0379	66.9929		0.9	1.1	2.713	2.713	16373
1732	45.36	Female	163	64.2	2012	General Population	operator	Siri	Predicted	39.5	60.5	25.181	55.516	38.581	85.056	63.7623	140.572	1097	1667	Low Activity	63.053	1.0113	61.0407	60.948		0.9	1.1	3.177	3.177	16871
1733	45.36	Female	163	64.2	2012	General Population	operator	Siri	Predicted	40.3	59.7	25.68	56.616	38.079	83.949	63.759	140.565	1086	1651	Low Activity	63.151	1.0096	61.0241	61.1603		0.9	1.1	3.177	3.177	16870.7
1734	45.36	Female	163	64.2	2012	General Population	operator	Siri	Predicted	40.4	59.6	25.773	56.82	37.983	83.738	63.756	140.558	1084	1648	Low Activity	63.167	1.0093	61.0939	61.1224		0.9	1.1	3.177	3.177	16870.3
1735	45.36	Female	163	64.2	2012	General Population	operator	Siri	Predicted	40.8	59.2	26.026	57.378	37.723	83.164	63.7489	140.542	1078	1639	Low Activity	63.211	1.0085	61.0699	61.2361		0.9	1.1	3.177	3.177	16869.5
1736	45.36	Female	163	64.2	2012	General Population	operator	Siri	Predicted	39.2	60.8	25.017	55.154	38.734	85.393	63.7508	140.546	1100	1672	Low Activity	63.009	1.0118	60.9413	61.1294	60.9604	0.9	1.1	3.177	3.177	16869.8
1737	45.36	Female	163	64.2	2012	General Population	operator	Siri	Predicted	40.5	59.5	25.794	56.865	37.95	83.665	63.7434	140.53	1083	1646	Low Activity	63.159	1.0092	61.0224	61.1796		0.9	1.1	3.177	3.177	16868.9
1738	23.62	Male	180	70.9	1020	General Population	operator	Siri	Predicted	22.1	77.9	18.476	40.733	64.986	143.27	83.4624	184.003	1751	2644	Low Activity	79.607	1.0484	77.0624	76.5728	77.0392	0.9	1.1	4.019	4.019	20327
1739	23.62	Male	180	70.9	1020	General Population	operator	Siri	Predicted	20.9	79.1	17.454	38.48	65.979	145.46	83.4336	183.94	1773	2677	Low Activity	79.375	1.0511	76.813	76.8235		0.9	1.1	4.019	4.019	20324
1740	23.62	Male	180	70.9	1020	General Population	operator	Siri	Predicted	21.9	78.1	18.282	40.306	65.139	143.607	83.4213	183.913	1754	2649	Low Activity	79.531	1.0489	76.9955	76.9535		0.9	1.1	4.019	4.019	20322.7
1741	23.62	Male	180	70.9	1020	General Population	operator	Siri	Predicted	21.9	78.1	18.306	40.357	65.108	143.538	83.4135	183.895	1754	2649	Low Activity	79.529	1.0488	76.9706	76.9736		0.9	1.1	4.019	4.019	20321.9
1742	23.62	Male	180	70.9	1020	General Population	operator	Siri	Predicted	22.2	77.8	18.543	40.88	64.863	142.999	83.4063	183.879	1748	2639	Low Activity	79.57	1.0482	77.046	76.981		0.9	1.1	4.019	4.019	20321.2
1743	23.62	Male	180	70.9	1020	General Population	operator	Siri	Predicted	22	78	18.348	40.45	65.049	143.407	83.3964	183.858	1752	2646	Low Activity	79.522	1.0487	76.8714	77.0589		0.9	1.1	4.019	4.019	20320.1
1744	24.62	Female	162	63.8	2013	General Population	operator	Siri	Predicted	29.8	70.2	18.698	41.221	44.006	97.017	62.7035	138.238	1211	1841	Low Activity	60.78	1.0316	58.7696	58.7726		0.9	1.1	3.076	3.076	16676.8
1745	24.62	Female	162	63.8	2013	General Population	operator	Siri	Predicted	31.4	68.6	19.659	43.341	43.044	94.895	62.7028	138.236	1190	1809	Low Activity	60.974	1.0284	58.9754	58.9541		0.9	1.1	3.076	3.076	16676.8
1746	24.62	Female	162	63.8	2013	General Population	operator	Siri	Predicted	32.2	67.8	20.168	44.462	42.528	93.759	62.6961	138.221	1179	1792	Low Activity	61.071	1.0266	59.0604	59.0625		0.9	1.1	3.076	3.076	16676
1747	24.62	Female	162	63.8	2013	General Population	operator	Siri	Predicted	31.7	68.3	19.869	43.804	42.827	94.418	62.6965	138.222	1185	1801	Low Activity	61.011	1.0276	59.0152	58.9878		0.9	1.1	3.076	3.076	16676
1748	24.62	Female	162	63.8	2013	General Population	operator	Siri	Predicted	32.9	67.1	20.602	45.419	42.088	92.788	62.6897	138.207	1169	1777	Low Activity	61.153	1.0251	59.1368	59.1501		0.9	1.1	3.076	3.076	16675.3
1749	24.62	Female	162	63.8	2013	General Population	operator	Siri	Predicted	31.9	68.1	20.019	44.133	42.663	94.056	62.6817	138.19	1182	1797	Low Activity	61.028	1.0271	58.9552	59.0814		0.9	1.1	3.076	3.076	16674.4
1750	24.48	Male	169	66.5	1021	General Population	operator	Siri	Predicted	27.3	72.7	21.408	47.196	57.022	125.712	78.4298	172.908	1558	2353	Low Activity	75.625	1.0371	73.3303	73.3468		0.9	1.1	3.507	3.507	18912
1751	24.48	Male	169	66.5	1021	General Population	operator	Siri	Predicted	27.3	72.7	21.395	47.167	57.025	125.718	78.4197	172.886	1558	2353	Low Activity	75.613	1.0371	73.3506	73.303		0.9	1.1	3.507	3.507	18911
1752	24.48	Male	169	66.5	1021	General Population	operator	Siri	Predicted	27.3	72.7	21.438	47.262	56.97	125.597	78.4079	172.86	1556	2350	Low Activity	75.611	1.037	73.2556	73.3941		0.9	1.1	3.507	3.507	18909.8
1753	24.48	Male	169	66.5	1021	General Population	operator	Siri	Predicted	27.4	72.6	21.494	47.385	56.911	125.468	78.4049	172.853	1555	2348	Low Activity	75.619	1.0368	73.3466	73.3202		0.9	1.1	3.507	3.507	18909.5
1754	24.48	Male	169	66.5	1021	General Population	operator	Siri	Predicted	27.4	72.6	21.501	47.401	56.901	125.445	78.4017	172.846	1555	2348	Low Activity	75.618	1.0368	73.2222	73.4419		0.9	1.1	3.507	3.507	18909.2
1755	24.48	Male	169	66.5	1021	General Population	operator	Siri	Predicted	27.3	72.7	21.363	47.098	57.032	125.734	78.3953	172.832	1558	2353	Low Activity	75.584	1.0372	73.3367	73.2601		0.9	1.1	3.507	3.507	18908.5
1756	21.4	Female	169	66.5	2014	General Population	operator	Siri	Predicted	24.1	75.9	13.191	29.081	41.621	91.758	54.8115	120.839	1127	1961	Active	52.493	1.0442	50.3683	50.4472		0.9	1.1	3.318	3.318	16240.7
1757	21.4	Female	169	66.5	2014	General Population	operator	Siri	Predicted	26.9	73.1	14.757	32.533	40.068	88.336	54.8248	120.868	1093	1902	Active	52.822	1.0379	50.7241	50.7479		0.9	1.1	3.318	3.318	16242.4
1758	21.4	Female	169	66.5	2014	General Population	operator	Siri	Predicted	27.3	72.7	14.971	33.006	39.849	87.851	54.8198	120.857	1089	1895	Active	52.861	1.0371	50.7406	50.8091		0.9	1.1	3.318	3.318	16241.7
1759	21.4	Female	169	66.5	2014	General Population	operator	Siri	Predicted	27.7	72.3	15.194	33.496	39.623	87.353	54.816	120.849	1084	1648	Low Activity	52.902	1.0362	50.8082	50.8245		0.9	1.1	3.318	3.318	16241.3
1760	21.4	Female	169	66.5	2014	General Population	operator	Siri	Predicted	26.8	73.2	14.672	32.347	40.146	88.506	54.8181	120.853	1095	1905	Active	52.799	1.0382	50.7155	50.7103		0.9	1.1	3.318	3.318	16241.5
1761	21.4	Female	169	66.5	2014	General Population	operator	Siri	Predicted	27.7	72.3	15.171	33.446	39.641	87.394	54.8121	120.84	1084	1886	Active	52.894	1.0363	50.7834	50.8329		0.9	1.1	3.318	3.318	16240.8
1762	23.73	Female	167	65.7	2015	General Population	operator	Siri	Predicted	28.8	71.2	15.725	34.668	38.9	85.759	54.625	120.428	1067	1622	Low Activity	52.836	1.0339	50.4146	50.7147	50.8526	0.9	1.1	3.254	3.254	16077.8
1763	23.73	Female	167	65.7	2015	General Population	operator	Siri	Predicted	28.4	71.6	15.509	34.191	39.101	86.202	54.6093	120.393	1071	1628	Low Activity	52.778	1.0347	50.6529	50.7985		0.9	1.1	3.254	3.254	16075.9
1764	23.73	Female	167	65.7	2015	General Population	operator	Siri	Predicted	28.6	71.4	15.594	34.379	39.009	86	54.603	120.379	1069	1625	Low Activity	52.789	1.0344	50.8071	50.6675		0.9	1.1	3.254	3.254	16075.1
1765	23.73	Female	167	65.7	2015	General Population	operator	Siri	Predicted	27.5	72.5	15.014	33.1	39.583	87.266	54.5971	120.366	1082	1645	Low Activity	52.667	1.0367	50.6848	50.5446		0.9	1.1	3.254	3.254	16074.3
1766	23.73	Female	167	65.7	2015	General Population	operator	Siri	Predicted	28.3	71.7	15.449	34.059	39.145	86.299	54.5936	120.358	1072	1629	Low Activity	52.752	1.0349	50.6984	50.7005		0.9	1.1	3.254	3.254	16073.9
1767	23.73	Female	167	65.7	2015	General Population	operator	Siri	Predicted	29.1	70.9	15.856	34.957	38.723	85.37	54.5794	120.327	1063	1616	Low Activity	52.821	1.0333	50.8028	50.7352		0.9	1.1	3.254	3.254	16072.1
1768	24.98	Female	163.5	64.4	2016	General Population	operator	Siri	Predicted	24.5	75.5	14.143	31.18	43.692	96.324	57.8346	127.504	1184	2060	Active	55.434	1.0433	53.4005	53.4475		0.9	1.1	3.131	3.131	16221.7
1769	24.98	Female	163.5	64.4	2016	General Population	operator	Siri	Predicted	24.5	75.5	14.157	31.212	43.67	96.277	57.8276	127.488	1184	1800	Low Activity	55.431	1.0432	53.443	53.3982		0.9	1.1	3.131	3.131	16220.9
1770	24.98	Female	163.5	64.4	2016	General Population	operator	Siri	Predicted	24.9	75.1	14.394	31.733	43.427	95.741	57.821	127.474	1179	2051	Active	55.472	1.0423	53.469	53.4558		0.9	1.1	3.131	3.131	16220.1
1771	24.98	Female	163.5	64.4	2016	General Population	operator	Siri	Predicted	24.5	75.5	14.136	31.165	43.679	96.295	57.8151	127.46	1184	2060	Active	55.415	1.0433	53.3721	53.4379		0.9	1.1	3.131	3.131	16219.4
1772	24.98	Female	163.5	64.4	2016	General Population	operator	Siri	Predicted	24	76	13.871	30.58	43.942	96.875	57.8123	127.454	1190	2071	Active	55.359	1.0443	53.3658	53.3319		0.9	1.1	3.131	3.131	16219
1773	24.98	Female	163.5	64.4	2016	General Population	operator	Siri	Predicted	24.7	75.3	14.285	31.493	43.521	95.946	57.8057	127.44	1181	2055	Active	55.437	1.0427	53.3521	53.501		0.9	1.1	3.131	3.131	16218.3
1774	24.52	Female	170	66.9	2017	General Population	operator	Siri	Predicted	32.5	67.5	21.788	48.035	45.328	99.931	67.1165	147.967	1257	1911	Low Activity	65.417	1.026	63.3331	63.1488		0.9	1.1	3.364	3.364	17776.4
1775	24.52	Female	170	66.9	2017	General Population	operator	Siri	Predicted	32.6	67.4	21.911	48.306	45.205	99.661	67.1167	147.967	1255	1908	Low Activity	65.442	1.0256	63.2516	63.2804		0.9	1.1	3.364	3.364	17776.4
1776	24.52	Female	170	66.9	2017	General Population	operator	Siri	Predicted	33.1	66.9	22.244	49.039	44.863	98.906	67.1066	147.945	1247	1895	Low Activity	65.5	1.0245	63.2789	63.3691		0.9	1.1	3.364	3.364	17775.3
1777	24.52	Female	170	66.9	2017	General Population	operator	Siri	Predicted	33.3	66.7	22.343	49.258	44.755	98.668	67.098	147.926	1245	1892	Low Activity	65.512	1.0242	63.3042	63.3684		0.9	1.1	3.364	3.364	17774.3
1778	24.52	Female	170	66.9	2017	General Population	operator	Siri	Predicted	33.6	66.4	22.554	49.724	44.538	98.189	67.0923	147.913	1240	1885	Low Activity	65.549	1.0235	63.2884	63.4593		0.9	1.1	3.364	3.364	17773.7
1779	24.52	Female	170	66.9	2017	General Population	operator	Siri	Predicted	33.8	66.2	22.655	49.946	44.436	97.966	67.0917	147.912	1238	1882	Low Activity	65.569	1.0232	63.3912	63.3961		0.9	1.1	3.364	3.364	17773.6
1780	23.49	Female	158.5	62.4	2018	General Population	operator	Siri	Predicted	24	76	13.113	28.908	41.6	91.712	54.7124	120.62	1126	1712	Low Activity	52.388	1.0444	50.6272	50.4526	50.5182	0.9	1.1	2.947	2.947	15490.8
1781	23.49	Female	158.5	62.4	2018	General Population	operator	Siri	Predicted	24.3	75.7	13.283	29.285	41.406	91.285	54.6896	120.57	1122	1705	Low Activity	52.401	1.0437	50.5165	50.482		0.9	1.1	2.947	2.947	15488.1
1782	23.49	Female	158.5	62.4	2018	General Population	operator	Siri	Predicted	25.2	74.8	13.779	30.378	40.904	90.178	54.6833	120.556	1111	1689	Low Activity	52.496	1.0417	50.5189	50.6687		0.9	1.1	2.947	2.947	15487.3
1783	23.49	Female	158.5	62.4	2018	General Population	operator	Siri	Predicted	23.7	76.3	12.967	28.586	41.711	91.958	54.6779	120.544	1129	1716	Low Activity	52.327	1.0449	50.3554	50.494		0.9	1.1	2.947	2.947	15486.7
1784	23.49	Female	158.5	62.4	2018	General Population	operator	Siri	Predicted	26.1	73.9	14.269	31.459	40.403	89.074	54.6724	120.532	1100	1672	Low Activity	52.585	1.0397	50.6933	50.6727		0.9	1.1	2.947	2.947	15486
1785	23.49	Female	158.5	62.4	2018	General Population	operator	Siri	Predicted	25.8	74.2	14.131	31.153	40.539	89.374	54.6703	120.527	1103	1677	Low Activity	52.555	1.0402	50.7079	50.5982		0.9	1.1	2.947	2.947	15485.7
1786	20.05	Female	168	66.1	2019	General Population	operator	Siri	Predicted	18.7	81.3	11.238	24.776	48.969	107.959	60.2078	132.735	1309	1990	Low Activity	57.005	1.0562	54.9741	54.841		0.9	1.1	3.278	3.278	16829.4
1787	20.05	Female	168	66.1	2019	General Population	operator	Siri	Predicted	21.9	78.1	13.182	29.062	47.038	103.701	60.22	132.762	1267	1926	Low Activity	57.409	1.049	55.2764	55.3462		0.9	1.1	3.278	3.278	16830.8
1788	20.05	Female	168	66.1	2019	General Population	operator	Siri	Predicted	22.4	77.6	13.472	29.701	46.743	103.05	60.215	132.751	1260	1915	Low Activity	57.463	1.0479	55.3047	55.426		0.9	1.1	3.278	3.278	16830.2
1789	20.05	Female	168	66.1	2019	General Population	operator	Siri	Predicted	22.1	77.9	13.28	29.278	46.931	103.466	60.2115	132.744	1264	1921	Low Activity	57.421	1.0486	55.3787	55.2681		0.9	1.1	3.278	3.278	16829.8
1790	20.05	Female	168	66.1	2019	General Population	operator	Siri	Predicted	22.4	77.6	13.457	29.668	46.751	103.067	60.2077	132.735	1261	1917	Low Activity	57.453	1.0479	55.3018	55.4095		0.9	1.1	3.278	3.278	16829.4
1791	20.05	Female	168	66.1	2019	General Population	operator	Siri	Predicted	22.4	77.6	13.502	29.766	46.704	102.965	60.2056	132.731	1260	1915	Low Activity	57.46	1.0478	55.3677	55.3578		0.9	1.1	3.278	3.278	16829.1
1792	20.08	Female	170	66.9	2020	General Population	operator	Siri	Predicted	48.4	51.6	45.681	100.71	48.76	107.497	94.4409	208.206	1443	2193	Low Activity	95.084	0.9932	92.7519	92.8159		0.9	1.1	3.35	3.35	20553.5
1793	20.08	Female	170	66.9	2020	General Population	operator	Siri	Predicted	47.2	52.8	44.572	98.263	49.86	109.922	94.4313	208.185	1466	2228	Low Activity	94.851	0.9956	92.5609	92.5413		0.9	1.1	3.35	3.35	20552.6
1794	20.08	Female	170	66.9	2020	General Population	operator	Siri	Predicted	47.2	52.8	44.543	98.201	49.881	109.969	94.4247	208.171	1467	2230	Low Activity	94.839	0.9956	92.5744	92.5045		0.9	1.1	3.35	3.35	20552
1795	20.08	Female	170	66.9	2020	General Population	operator	Siri	Predicted	48.4	51.6	45.701	100.754	48.717	107.403	94.4188	208.158	1442	2192	Low Activity	95.068	0.9932	92.8854	92.6506		0.9	1.1	3.35	3.35	20551.4
1796	20.08	Female	170	66.9	2020	General Population	operator	Siri	Predicted	48.2	51.8	45.479	100.264	48.939	107.892	94.4181	208.156	1446	2198	Low Activity	95.022	0.9936	92.6158	92.8292		0.9	1.1	3.35	3.35	20551.3
1797	20.08	Female	170	66.9	2020	General Population	operator	Siri	Predicted	47.7	52.3	45.002	99.213	49.409	108.928	94.4108	208.14	1457	2215	Low Activity	94.919	0.9946	92.538	92.7009		0.9	1.1	3.35	3.35	20550.7
1798	50.36	Female	159.5	62.8	2021	General Population	operator	Siri	Predicted	34.9	65.1	24.808	54.692	46.324	102.127	71.1317	156.819	1295	1968	Low Activity	69.677	1.0209	67.6572	67.6186		0.9	1.1	3.066	3.066	17397.8
1799	50.36	Female	159.5	62.8	2021	General Population	operator	Siri	Predicted	36.6	63.4	26.058	57.447	45.063	99.346	71.1203	156.793	1268	1927	Low Activity	69.919	1.0172	67.8811	67.8792		0.9	1.1	3.066	3.066	17396.6
1800	50.36	Female	159.5	62.8	2021	General Population	operator	Siri	Predicted	37.7	62.3	26.782	59.044	44.33	97.73	71.1119	156.775	1252	1903	Low Activity	70.058	1.015	67.9782	68.0595		0.9	1.1	3.066	3.066	17395.8
1801	50.36	Female	159.5	62.8	2021	General Population	operator	Siri	Predicted	37.7	62.3	26.835	59.16	44.272	97.603	71.1067	156.763	1251	1902	Low Activity	70.064	1.0149	68.0768	67.9728		0.9	1.1	3.066	3.066	17395.2
1802	50.36	Female	159.5	62.8	2021	General Population	operator	Siri	Predicted	37.8	62.2	26.842	59.176	44.258	97.573	71.1002	156.749	1250	1900	Low Activity	70.059	1.0149	68.0144	68.0263		0.9	1.1	3.066	3.066	17394.5
1803	50.36	Female	159.5	62.8	2021	General Population	operator	Siri	Predicted	37.5	62.5	26.687	58.835	44.409	97.906	71.0961	156.74	1254	1906	Low Activity	70.024	1.0153	67.9733	67.9974		0.9	1.1	3.066	3.066	17394.1
1804	24.5	Female	163.5	64.4	2022	General Population	operator	Siri	Predicted	44	56	34.181	75.357	43.454	95.799	77.6348	171.156	1259	1914	Low Activity	77.482	1.002	75.3387	75.4052		0.9	1.1	3.13	3.13	18384
1805	24.5	Female	163.5	64.4	2022	General Population	operator	Siri	Predicted	43.5	56.5	33.753	74.412	43.872	96.722	77.6254	171.135	1268	1927	Low Activity	77.387	1.0031	75.2345	75.3191		0.9	1.1	3.13	3.13	18383.1
1806	24.5	Female	163.5	64.4	2022	General Population	operator	Siri	Predicted	42.8	57.2	33.238	73.277	44.385	97.853	77.6231	171.13	1279	1944	Low Activity	77.281	1.0044	75.1038	75.2377		0.9	1.1	3.13	3.13	18382.9
1807	24.5	Female	163.5	64.4	2022	General Population	operator	Siri	Predicted	43.5	56.5	33.727	74.355	43.893	96.767	77.6195	171.122	1269	1929	Low Activity	77.377	1.0031	75.2924	75.24		0.9	1.1	3.13	3.13	18382.5
1808	24.5	Female	163.5	64.4	2022	General Population	operator	Siri	Predicted	43.7	56.3	33.934	74.812	43.677	96.29	77.6105	171.102	1264	1921	Low Activity	77.41	1.0026	75.2825	75.3175		0.9	1.1	3.13	3.13	18381.6
1809	24.5	Female	163.5	64.4	2022	General Population	operator	Siri	Predicted	43.5	56.5	33.751	74.409	43.857	96.687	77.608	171.096	1268	1927	Low Activity	77.371	1.0031	75.3198	75.2019		0.9	1.1	3.13	3.13	18381.3
1810	60.45	Female	157	61.8	2023	General Population	operator	Siri	Predicted	47.9	52.1	39.77	87.678	43.326	95.518	83.0964	183.196	1278	2224	Active	83.577	0.9943	81.435	81.5961		0.9	1.1	3.007	3.007	18374.5
1811	60.45	Female	157	61.8	2023	General Population	operator	Siri	Predicted	49.3	50.7	40.921	90.215	42.163	92.954	83.0843	183.17	1253	2180	Active	83.798	0.9915	81.7107	81.7635		0.9	1.1	3.007	3.007	18373.4
1812	60.45	Female	157	61.8	2023	General Population	operator	Siri	Predicted	48.8	51.2	40.586	89.477	42.502	93.701	83.088	183.178	1261	2194	Active	83.734	0.9923	81.6714	81.6741		0.9	1.1	3.007	3.007	18373.7
1813	60.45	Female	157	61.8	2023	General Population	operator	Siri	Predicted	49.4	50.6	41.009	90.409	42.077	92.764	83.0861	183.173	1251	1902	Low Activity	83.817	0.9913	81.7626	81.7503		0.9	1.1	3.007	3.007	18373.6
1814	60.45	Female	157	61.8	2023	General Population	operator	Siri	Predicted	49	51	40.69	89.707	42.387	93.448	83.0773	183.154	1258	2189	Active	83.745	0.992	81.6739	81.6944		0.9	1.1	3.007	3.007	18372.7
1815	60.45	Female	157	61.8	2023	General Population	operator	Siri	Predicted	49	51	40.715	89.761	42.363	93.394	83.0777	183.155	1257	1911	Low Activity	83.75	0.992	81.6688	81.7102		0.9	1.1	3.007	3.007	18372.8
1816	24.07	Male	187	73.6	1022	General Population	operator	Siri	Predicted	25.3	74.7	24.751	54.567	72.908	160.734	97.6592	215.302	1981	2991	Low Activity	93.781	1.0413	91.1153	90.8784		0.9	1.1	4.353	4.353	22339.8
1817	24.07	Male	187	73.6	1022	General Population	operator	Siri	Predicted	25.6	74.4	24.978	55.066	72.651	160.167	97.6282	215.233	1975	2982	Low Activity	93.799	1.0408	91.0299	90.9991		0.9	1.1	4.353	4.353	22336.8
1818	24.07	Male	187	73.6	1022	General Population	operator	Siri	Predicted	24.8	75.2	24.163	53.27	73.435	161.898	97.5985	215.168	1992	3008	Low Activity	93.607	1.0426	90.8341	90.8122		0.9	1.1	4.353	4.353	22333.9
1819	24.07	Male	187	73.6	1022	General Population	operator	Siri	Predicted	24.4	75.6	23.82	52.513	73.758	162.608	97.5775	215.122	1999	3018	Low Activity	93.519	1.0434	90.7416	90.728		0.9	1.1	4.353	4.353	22331.9
1820	24.07	Male	187	73.6	1022	General Population	operator	Siri	Predicted	24.2	75.8	23.587	52.001	73.968	163.071	97.5552	215.072	2004	3026	Low Activity	93.452	1.0439	90.7128	90.6226		0.9	1.1	4.353	4.353	22329.7
1821	24.07	Male	187	73.6	1022	General Population	operator	Siri	Predicted	25.4	74.6	24.822	54.723	72.715	160.31	97.5372	215.033	1976	2984	Low Activity	93.685	1.0411	90.9625	90.839		0.9	1.1	4.353	4.353	22327.9
1822	24.05	Female	160.5	63.2	2024	General Population	operator	Siri	Predicted	24.9	75.1	12.317	27.154	37.164	81.932	49.4808	109.086	1009	1534	Low Activity	47.471	1.0423	45.5598	45.5664		0.9	1.1	3.021	3.021	14978.6
1823	24.05	Female	160.5	63.2	2024	General Population	operator	Siri	Predicted	26.6	73.4	13.14	28.968	36.33	80.094	49.4699	109.062	990	1505	Low Activity	47.627	1.0387	45.6965	45.7423		0.9	1.1	3.021	3.021	14977.2
1824	24.05	Female	160.5	63.2	2024	General Population	operator	Siri	Predicted	26.2	73.8	12.93	28.506	36.513	80.497	49.4431	109.003	994	1511	Low Activity	47.56	1.0396	45.725	45.5809		0.9	1.1	3.021	3.021	14973.8
1825	24.05	Female	160.5	63.2	2024	General Population	operator	Siri	Predicted	25.1	74.9	12.386	27.307	37.051	81.684	49.4377	108.991	1006	1529	Low Activity	47.446	1.042	45.5137	45.5627		0.9	1.1	3.021	3.021	14973.1
1826	24.05	Female	160.5	63.2	2024	General Population	operator	Siri	Predicted	25.4	74.6	12.58	27.734	36.852	81.246	49.4322	108.979	1002	1523	Low Activity	47.48	1.0411	45.5056	45.639		0.9	1.1	3.021	3.021	14972.4
1827	24.05	Female	160.5	63.2	2024	General Population	operator	Siri	Predicted	27	73	13.35	29.432	36.084	79.553	49.4344	108.984	985	1497	Low Activity	47.637	1.0377	45.6689	45.7909		0.9	1.1	3.021	3.021	14972.6
1828	26.15	Male	176	69.3	1023	General Population	operator	Siri	Predicted	23.8	76.2	17.797	39.235	57.117	125.922	74.9137	165.157	1546	2334	Low Activity	71.699	1.0448	69.1785	69.3529		0.9	1.1	3.853	3.853	19100.8
1829	26.15	Male	176	69.3	1023	General Population	operator	Siri	Predicted	24.4	75.6	18.261	40.258	56.642	124.874	74.9027	165.132	1535	2318	Low Activity	71.782	1.0435	69.302	69.3968		0.9	1.1	3.853	3.853	19099.6
1830	26.15	Male	176	69.3	1023	General Population	operator	Siri	Predicted	24	76	17.967	39.61	56.924	125.497	74.891	165.106	1541	2327	Low Activity	71.712	1.0443	69.3212	69.5941	69.2377	0.9	1.1	3.853	3.853	19098.3
1831	26.15	Male	176	69.3	1023	General Population	operator	Siri	Predicted	23.9	76.1	17.909	39.483	56.984	125.628	74.8934	165.112	1543	2330	Low Activity	71.703	1.0445	69.1701	69.3699		0.9	1.1	3.853	3.853	19098.6
1832	26.15	Male	176	69.3	1023	General Population	operator	Siri	Predicted	24.5	75.5	18.318	40.384	56.487	124.532	74.8046	164.916	1531	2312	Low Activity	71.705	1.0432	69.2123	69.3322		0.9	1.1	3.853	3.853	19089
1833	26.15	Male	176	69.3	1023	General Population	operator	Siri	Predicted	24.4	75.6	18.24	40.212	56.637	124.864	74.877	165.076	1535	2318	Low Activity	71.755	1.0435	69.3587	69.2853		0.9	1.1	3.853	3.853	19096.8
1835	25.54	Female	151	59.4	2025	General Population	operator	Siri	Predicted	13	87	4.925	10.858	33.047	72.855	37.9719	83.7136	873	1327	Low Activity	35.515	1.0692	33.8147	34.0117	33.8724	0.9	1.1	2.683	2.683	12805.5
1836	25.54	Female	151	59.4	2025	General Population	operator	Siri	Predicted	17.1	82.9	6.488	14.303	31.418	69.265	37.9057	83.5678	837	1272	Low Activity	35.77	1.0597	34.0437	34.1555		0.9	1.1	2.683	2.683	12796
1837	25.54	Female	151	59.4	2025	General Population	operator	Siri	Predicted	16.1	83.9	6.093	13.432	31.811	70.131	37.9036	83.563	845	1284	Low Activity	35.689	1.0621	34.0374	33.9983		0.9	1.1	2.683	2.683	12795.7
1838	25.54	Female	151	59.4	2025	General Population	operator	Siri	Predicted	16.6	83.4	6.307	13.904	31.589	69.642	37.896	83.5465	840	1277	Low Activity	35.725	1.0608	34.0502	34.0584		0.9	1.1	2.683	2.683	12794.6
1839	25.54	Female	151	59.4	2025	General Population	operator	Siri	Predicted	16.4	83.6	6.221	13.714	31.673	69.826	37.8935	83.5408	842	1280	Low Activity	35.705	1.0613	33.997	34.0721		0.9	1.1	2.683	2.683	12794.2
1840	25.54	Female	151	59.4	2025	General Population	operator	Siri	Predicted	16.4	83.6	6.2	13.669	31.693	69.871	37.8933	83.5404	843	1281	Low Activity	35.701	1.0614	34.044	34.0165		0.9	1.1	2.683	2.683	12794.2
1841	24.12	Male	168.5	66.3	1024	General Population	operator	Siri	Predicted	7.3	92.7	4.192	9.242	53.439	117.813	57.6313	127.055	1396	2429	Active	53.239	1.0825	51.1447	50.8384	51.0028	0.9	1.1	3.48	3.48	16555.1
1842	24.12	Male	168.5	66.3	1024	General Population	operator	Siri	Predicted	8	92	4.596	10.132	53.026	116.903	57.6224	127.036	1387	2413	Active	53.312	1.0808	51.2055	51.0892		0.9	1.1	3.48	3.48	16554
1843	24.12	Male	168.5	66.3	1024	General Population	operator	Siri	Predicted	6.6	93.4	3.777	8.327	53.864	118.75	57.6413	127.077	1405	2445	Active	53.164	1.0842	51.049	50.9489		0.9	1.1	3.48	3.48	16556.3
1844	24.12	Male	168.5	66.3	1024	General Population	operator	Siri	Predicted	6.5	93.5	3.749	8.265	53.885	118.796	57.6339	127.061	1405	2445	Active	53.152	1.0843	50.9838	50.9893		0.9	1.1	3.48	3.48	16555.4
1845	24.12	Male	168.5	66.3	1024	General Population	operator	Siri	Predicted	7.1	92.9	4.086	9.008	53.544	118.045	57.6299	127.052	1398	2433	Active	53.216	1.0829	51.0085	51.0936		0.9	1.1	3.48	3.48	16554.9
1846	24.12	Male	168.5	66.3	1024	General Population	operator	Siri	Predicted	6.6	93.4	3.831	8.445	53.796	118.6	57.6265	127.045	1403	2441	Active	53.162	1.084	51.0043	50.9885		0.9	1.1	3.48	3.48	16554.5
1847	21.75	Female	163.5	64.4	2026	General Population	operator	Siri	Predicted	33.1	66.9	19.303	42.556	38.997	85.974	58.3003	128.53	1084	1648	Low Activity	56.9	1.0246	54.838	54.9444		0.9	1.1	3.121	3.121	16277.1
1848	21.75	Female	163.5	64.4	2026	General Population	operator	Siri	Predicted	34.4	65.6	20.051	44.206	38.24	84.304	58.2912	128.51	1068	1623	Low Activity	57.043	1.0219	55.0978	54.9703		0.9	1.1	3.121	3.121	16276
1849	21.75	Female	163.5	64.4	2026	General Population	operator	Siri	Predicted	33	67	19.234	42.403	39.054	86.099	58.2877	128.502	1085	1649	Low Activity	56.874	1.0248	54.8901	54.8415		0.9	1.1	3.121	3.121	16275.6
1850	21.75	Female	163.5	64.4	2026	General Population	operator	Siri	Predicted	33.4	66.6	19.476	42.936	38.805	85.55	58.2802	128.486	1080	1642	Low Activity	56.917	1.024	54.8605	54.9553		0.9	1.1	3.121	3.121	16274.7
1851	21.75	Female	163.5	64.4	2026	General Population	operator	Siri	Predicted	34.1	65.9	19.887	43.844	38.392	84.64	58.2795	128.484	1071	1628	Low Activity	56.999	1.0225	55.0223	54.9585		0.9	1.1	3.121	3.121	16274.6
1852	21.75	Female	163.5	64.4	2026	General Population	operator	Siri	Predicted	34	66	19.79	43.629	38.485	84.844	58.2742	128.473	1073	1631	Low Activity	56.974	1.0228	54.9132	55.0187		0.9	1.1	3.121	3.121	16274
1853	19.96	Female	166	65.4	2027	General Population	operator	Siri	Predicted	23.2	76.8	12.377	27.287	40.946	90.27	53.3231	117.557	1106	1681	Low Activity	50.976	1.046	48.8792	49.0282		0.9	1.1	3.206	3.206	15844.7
1854	19.96	Female	166	65.4	2027	General Population	operator	Siri	Predicted	24.9	75.1	13.293	29.306	40.037	88.265	53.3293	117.571	1087	1652	Low Activity	51.167	1.0423	49.1605	49.128		0.9	1.1	3.206	3.206	15845.5
1855	19.96	Female	166	65.4	2027	General Population	operator	Siri	Predicted	24.2	75.8	12.925	28.496	40.404	89.074	53.3289	117.57	1095	1664	Low Activity	51.092	1.0438	49.0099	49.1294		0.9	1.1	3.206	3.206	15845.4
1856	19.96	Female	166	65.4	2027	General Population	operator	Siri	Predicted	23.7	76.3	12.661	27.913	40.661	89.642	53.3221	117.555	1100	1672	Low Activity	51.032	1.0449	48.977	49.0434		0.9	1.1	3.206	3.206	15844.6
1857	19.96	Female	166	65.4	2027	General Population	operator	Siri	Predicted	25.7	74.3	13.728	30.264	39.592	87.286	53.3198	117.55	1077	1637	Low Activity	51.246	1.0405	49.261	49.1861		0.9	1.1	3.206	3.206	15844.3
1858	19.96	Female	166	65.4	2027	General Population	operator	Siri	Predicted	25.4	74.6	13.527	29.821	39.789	87.719	53.3153	117.54	1081	1643	Low Activity	51.201	1.0413	49.2212	49.1366		0.9	1.1	3.206	3.206	15843.7
1859	20.07	Female	171.5	67.5	2028	General Population	operator	Siri	Predicted	21.2	78.8	11.595	25.563	43.027	94.859	54.6224	120.422	1157	1759	Low Activity	51.999	1.0504	49.9234	49.6331	49.8208	0.9	1.1	3.404	3.404	16390.4
1860	20.07	Female	171.5	67.5	2028	General Population	operator	Siri	Predicted	22.9	77.1	12.509	27.577	42.102	92.819	54.6108	120.396	1137	1728	Low Activity	52.173	1.0467	50.0021	50.0901		0.9	1.1	3.404	3.404	16388.9
1861	20.07	Female	171.5	67.5	2028	General Population	operator	Siri	Predicted	21.3	78.7	11.651	25.687	42.953	94.695	54.604	120.381	1155	1756	Low Activity	51.994	1.0502	49.9162	49.8173		0.9	1.1	3.404	3.404	16388.1
1862	20.07	Female	171.5	67.5	2028	General Population	operator	Siri	Predicted	22.2	77.8	12.096	26.668	42.502	93.7	54.5981	120.368	1145	1740	Low Activity	52.078	1.0484	49.8962	50.0065		0.9	1.1	3.404	3.404	16387.3
1863	20.07	Female	171.5	67.5	2028	General Population	operator	Siri	Predicted	21.2	78.8	11.601	25.576	42.996	94.789	54.5968	120.365	1156	1757	Low Activity	51.977	1.0504	49.8076	49.8926		0.9	1.1	3.404	3.404	16387.2
1864	20.07	Female	171.5	67.5	2028	General Population	operator	Siri	Predicted	21.3	78.7	11.634	25.648	42.96	94.71	54.5936	120.358	1155	1756	Low Activity	51.981	1.0503	49.9109	49.7968		0.9	1.1	3.404	3.404	16386.8
1865	24.64	Female	173.5	68.3	2029	General Population	operator	Siri	Predicted	25.3	74.7	17.671	38.957	52.07	114.795	69.7409	153.752	1415	2151	Low Activity	66.971	1.0414	64.7735	64.6628		0.9	1.1	3.49	3.49	18337.5
1866	24.64	Female	173.5	68.3	2029	General Population	operator	Siri	Predicted	24.5	75.5	17.085	37.665	52.651	116.075	69.7354	153.74	1427	2169	Low Activity	66.847	1.0432	64.5614	64.6282		0.9	1.1	3.49	3.49	18336.9
1867	24.64	Female	173.5	68.3	2029	General Population	operator	Siri	Predicted	25.4	74.6	17.725	39.077	52.006	114.653	69.7309	153.73	1413	2148	Low Activity	66.973	1.0412	64.6657	64.7744		0.9	1.1	3.49	3.49	18336.4
1868	24.64	Female	173.5	68.3	2029	General Population	operator	Siri	Predicted	25.6	74.4	17.816	39.277	51.91	114.441	69.7254	153.718	1411	2145	Low Activity	66.986	1.0409	64.7201	64.7467		0.9	1.1	3.49	3.49	18335.8
1869	24.64	Female	173.5	68.3	2029	General Population	operator	Siri	Predicted	25.5	74.5	17.814	39.274	51.91	114.441	69.724	153.715	1411	2145	Low Activity	66.984	1.0409	64.702	64.7617		0.9	1.1	3.49	3.49	18335.6
1870	24.64	Female	173.5	68.3	2029	General Population	operator	Siri	Predicted	25.4	74.6	17.73	39.089	51.988	114.614	69.7184	153.703	1413	2148	Low Activity	66.962	1.0412	64.7403	64.6794		0.9	1.1	3.49	3.49	18335
1871	19.97	Female	159	62.6	2030	General Population	operator	Siri	Predicted	39	61	26.09	57.52	40.834	90.023	66.9242	147.543	1159	1762	Low Activity	66.111	1.0123	64.1375	64.1414		0.9	1.1	2.954	2.954	16914.2
1872	19.97	Female	159	62.6	2030	General Population	operator	Siri	Predicted	38.5	61.5	25.779	56.832	41.133	90.683	66.9119	147.516	1165	1771	Low Activity	66.037	1.0133	63.9741	64.1567		0.9	1.1	2.954	2.954	16912.9
1873	19.97	Female	159	62.6	2030	General Population	operator	Siri	Predicted	38.2	61.8	25.545	56.317	41.363	91.189	66.9075	147.506	1170	1778	Low Activity	65.986	1.014	63.9718	64.0566		0.9	1.1	2.954	2.954	16912.4
1874	19.97	Female	159	62.6	2030	General Population	operator	Siri	Predicted	38.3	61.7	25.601	56.44	41.299	91.049	66.8999	147.489	1169	1777	Low Activity	65.99	1.0138	63.9749	64.0623		0.9	1.1	2.954	2.954	16911.6
1875	19.97	Female	159	62.6	2030	General Population	operator	Siri	Predicted	39.5	60.5	26.423	58.254	40.481	89.246	66.9049	147.5	1151	1750	Low Activity	66.161	1.0112	64.1572	64.2215		0.9	1.1	2.954	2.954	16912.2
1876	19.97	Female	159	62.6	2030	General Population	operator	Siri	Predicted	38.8	61.2	25.986	57.289	40.91	90.191	66.8957	147.48	1160	1763	Low Activity	66.064	1.0126	64.032	64.1533		0.9	1.1	2.954	2.954	16911.2
1877	24.96	Female	161.5	63.6	2031	General Population	operator	Siri	Predicted	16.5	83.5	7.926	17.475	40.227	88.686	48.1539	106.161	1070	1862	Active	45.378	1.0612	43.4868	43.2096	43.4315	0.9	1.1	3.059	3.059	14873.4
1878	24.96	Female	161.5	63.6	2031	General Population	operator	Siri	Predicted	17.4	82.6	8.379	18.473	39.771	87.679	48.1497	106.152	1060	1844	Active	45.465	1.059	43.5053	43.5885		0.9	1.1	3.059	3.059	14872.8
1879	24.96	Female	161.5	63.6	2031	General Population	operator	Siri	Predicted	18.3	81.7	8.828	19.463	39.32	86.685	48.1483	106.149	1050	1827	Active	45.555	1.0569	43.7075	43.5653		0.9	1.1	3.059	3.059	14872.6
1880	24.96	Female	161.5	63.6	2031	General Population	operator	Siri	Predicted	16.9	83.1	8.137	17.939	40.008	88.203	48.1449	106.141	1065	1853	Active	45.412	1.0602	43.4428	43.5445		0.9	1.1	3.059	3.059	14872.2
1881	24.96	Female	161.5	63.6	2031	General Population	operator	Siri	Predicted	17.7	82.3	8.542	18.833	39.606	87.315	48.1479	106.148	1056	1837	Active	45.496	1.0583	43.515	43.6414		0.9	1.1	3.059	3.059	14872.6
1882	24.96	Female	161.5	63.6	2031	General Population	operator	Siri	Predicted	17.7	82.3	8.514	18.77	39.628	87.364	48.1417	106.134	1057	1839	Active	45.485	1.0584	43.5815	43.5525		0.9	1.1	3.059	3.059	14871.8
1883	21.57	Male	176	69.3	1025	General Population	operator	Siri	Predicted	9.7	90.3	8.137	17.94	75.575	166.615	83.7125	184.555	1983	2994	Low Activity	77.746	1.0767	75.3446	75.2285		0.9	1.1	3.811	3.811	20023.9
1884	21.57	Male	176	69.3	1025	General Population	operator	Siri	Predicted	9.7	90.3	8.134	17.931	75.533	166.522	83.6668	184.454	1982	2993	Low Activity	77.704	1.0767	75.2329	75.2559		0.9	1.1	3.811	3.811	20019.3
1885	21.57	Male	176	69.3	1025	General Population	operator	Siri	Predicted	8.8	91.2	7.377	16.263	76.269	168.144	83.6458	184.407	1998	3017	Low Activity	77.532	1.0789	75.0924	75.0528		0.9	1.1	3.811	3.811	20017.1
1886	21.57	Male	176	69.3	1025	General Population	operator	Siri	Predicted	9.7	90.3	8.077	17.807	75.553	166.565	83.6297	184.372	1982	2993	Low Activity	77.659	1.0769	75.2067	75.1923		0.9	1.1	3.811	3.811	20015.5
1887	21.57	Male	176	69.3	1025	General Population	operator	Siri	Predicted	9.4	90.6	7.891	17.396	75.726	166.948	83.6167	184.343	1986	2999	Low Activity	77.609	1.0774	75.0385	75.2617		0.9	1.1	3.811	3.811	20014.2
1888	21.57	Male	176	69.3	1025	General Population	operator	Siri	Predicted	9.9	90.1	8.316	18.334	75.287	165.979	83.6026	184.312	1976	2984	Low Activity	77.682	1.0762	75.1726	75.2739		0.9	1.1	3.811	3.811	20012.7
1889	31.21	Male	172	67.7	1026	General Population	operator	Siri	Predicted	21	79	13.473	29.702	50.539	111.419	64.0113	141.121	1358	2051	Low Activity	60.914	1.0508	58.5934	58.6258		0.9	1.1	3.709	3.709	17570.5
1890	31.21	Male	172	67.7	1026	General Population	operator	Siri	Predicted	20.8	79.2	13.288	29.295	50.716	111.811	64.0046	141.106	1362	2057	Low Activity	60.87	1.0515	58.5775	58.5551		0.9	1.1	3.709	3.709	17569.7
1891	31.21	Male	172	67.7	1026	General Population	operator	Siri	Predicted	20.6	79.4	13.172	29.039	50.827	112.054	63.9987	141.093	1365	2061	Low Activity	60.842	1.0519	58.5897	58.4851		0.9	1.1	3.709	3.709	17569
1892	31.21	Male	172	67.7	1026	General Population	operator	Siri	Predicted	21.1	78.9	13.525	29.817	50.473	111.274	63.9981	141.092	1357	2049	Low Activity	60.912	1.0507	58.5853	58.6311		0.9	1.1	3.709	3.709	17568.9
1893	31.21	Male	172	67.7	1026	General Population	operator	Siri	Predicted	22.2	77.8	14.185	31.273	49.825	109.846	64.0103	141.118	1343	2028	Low Activity	61.057	1.0484	58.7022	58.8028		0.9	1.1	3.709	3.709	17570.4
1894	31.21	Male	172	67.7	1026	General Population	operator	Siri	Predicted	22.3	77.7	14.282	31.486	49.721	109.616	64.003	141.103	1341	2025	Low Activity	61.07	1.048	58.5693	58.76	58.7712	0.9	1.1	3.709	3.709	17569.5
1899	24.73	Female	164.5	64.8	2032	General Population	operator	Siri	Predicted	21.3	78.7	11.613	25.601	42.839	94.443	54.4512	120.044	1152	1751	Low Activity	51.847	1.0502	49.9094	49.7681		0.9	1.1	3.167	3.167	15881.4
1900	24.73	Female	164.5	64.8	2032	General Population	operator	Siri	Predicted	21.9	78.1	11.934	26.311	42.503	93.704	54.4378	120.015	1145	1740	Low Activity	51.9	1.0489	49.9042	49.8792		0.9	1.1	3.167	3.167	15879.8
1901	24.73	Female	164.5	64.8	2032	General Population	operator	Siri	Predicted	22	78	12	26.456	42.428	93.538	54.4287	119.995	1143	1737	Low Activity	51.905	1.0486	49.8185	49.975		0.9	1.1	3.167	3.167	15878.6
1902	24.73	Female	164.5	64.8	2032	General Population	operator	Siri	Predicted	21.6	78.4	11.774	25.956	42.649	94.024	54.4225	119.981	1148	1745	Low Activity	51.853	1.0495	49.8845	49.8061		0.9	1.1	3.167	3.167	15877.9
1903	24.73	Female	164.5	64.8	2032	General Population	operator	Siri	Predicted	21.8	78.2	11.875	26.179	42.54	93.785	54.4146	119.964	1146	1742	Low Activity	51.867	1.0491	49.8322	49.885		0.9	1.1	3.167	3.167	15876.9
1904	24.73	Female	164.5	64.8	2032	General Population	operator	Siri	Predicted	22.2	77.8	12.088	26.649	42.316	93.291	54.4041	119.94	1141	1734	Low Activity	51.9	1.0482	49.9232	49.8611		0.9	1.1	3.167	3.167	15875.6
1905	24.66	Female	168	66.1	2033	General Population	operator	Siri	Predicted	25.5	74.5	14.24	31.394	41.556	91.615	55.796	123.009	1130	1718	Low Activity	53.6	1.041	51.5646	51.4804		0.9	1.1	3.292	3.292	16293.8
1906	24.66	Female	168	66.1	2033	General Population	operator	Siri	Predicted	26.9	73.1	14.996	33.06	40.784	89.912	55.7793	122.972	1113	1692	Low Activity	53.738	1.038	51.8238	51.6308	51.6895	0.9	1.1	3.292	3.292	16291.7
1907	24.66	Female	168	66.1	2033	General Population	operator	Siri	Predicted	27.1	72.9	15.113	33.319	40.654	89.626	55.7668	122.945	1110	1687	Low Activity	53.75	1.0375	51.6423	51.8252	51.7028	0.9	1.1	3.292	3.292	16290.2
1908	24.66	Female	168	66.1	2033	General Population	operator	Siri	Predicted	29.2	70.8	16.279	35.89	39.477	87.032	55.7563	122.922	1084	1648	Low Activity	53.976	1.033	51.9499	51.8474		0.9	1.1	3.292	3.292	16288.9
1909	24.66	Female	168	66.1	2033	General Population	operator	Siri	Predicted	27.4	72.6	15.297	33.725	40.453	89.183	55.7498	122.907	1105	1680	Low Activity	53.772	1.0368	51.9056	51.6627	51.726	0.9	1.1	3.292	3.292	16288
1910	24.66	Female	168	66.1	2033	General Population	operator	Siri	Predicted	28.4	71.6	15.81	34.855	39.933	88.038	55.743	122.892	1094	1663	Low Activity	53.869	1.0348	51.7797	51.8038		0.9	1.1	3.292	3.292	16287.2
1911	24.28	Female	158	62.2	2034	General Population	operator	Siri	Predicted	23.6	76.4	12.887	28.411	41.834	92.229	54.7213	120.64	1131	1968	Active	52.35	1.0453	50.4429	50.4686		0.9	1.1	2.931	2.931	15456.4
1912	24.28	Female	158	62.2	2034	General Population	operator	Siri	Predicted	25	75	13.689	30.18	41.033	90.461	54.722	120.641	1114	1938	Active	52.513	1.0421	50.5773	50.6597		0.9	1.1	2.931	2.931	15456.5
1913	24.28	Female	158	62.2	2034	General Population	operator	Siri	Predicted	23.6	76.4	12.933	28.513	41.777	92.102	54.7099	120.615	1130	1966	Active	52.349	1.0451	50.436	50.4736		0.9	1.1	2.931	2.931	15455.1
1914	24.28	Female	158	62.2	2034	General Population	operator	Siri	Predicted	23.8	76.2	12.997	28.654	41.711	91.957	54.708	120.611	1129	1716	Low Activity	52.36	1.0448	50.3974	50.5346		0.9	1.1	2.931	2.931	15454.8
1915	24.28	Female	158	62.2	2034	General Population	operator	Siri	Predicted	24	76	13.103	28.887	41.599	91.709	54.7017	120.597	1126	1712	Low Activity	52.376	1.0444	50.5044	50.4591		0.9	1.1	2.931	2.931	15454.1
1916	24.28	Female	158	62.2	2034	General Population	operator	Siri	Predicted	24.7	75.3	13.502	29.768	41.196	90.821	54.6982	120.589	1117	1698	Low Activity	52.453	1.0428	50.5933	50.5251		0.9	1.1	2.931	2.931	15453.7
1917	39.69	Female	163	64.2	2035	General Population	operator	Siri	Predicted	20.5	79.5	10.989	24.227	42.535	93.774	53.5244	118.001	1142	1416	Sedentary	50.879	1.052	48.8109	48.9562		0.9	1.1	3.159	3.159	15661.6
1918	39.69	Female	163	64.2	2035	General Population	operator	Siri	Predicted	19.4	80.6	10.374	22.871	43.142	95.112	53.5159	117.982	1155	1432	Sedentary	50.747	1.0546	48.7173	48.9218	48.786	0.9	1.1	3.159	3.159	15660.6
1919	39.69	Female	163	64.2	2035	General Population	operator	Siri	Predicted	21.3	78.7	11.383	25.096	42.122	92.863	53.5054	117.959	1133	1405	Sedentary	50.941	1.0503	48.9787	48.9135		0.9	1.1	3.159	3.159	15659.3
1920	39.69	Female	163	64.2	2035	General Population	operator	Siri	Predicted	22.1	77.9	11.812	26.042	41.689	91.909	53.5013	117.95	1123	1393	Sedentary	51.024	1.0486	49.0475	49.0106		0.9	1.1	3.159	3.159	15658.8
1921	39.69	Female	163	64.2	2035	General Population	operator	Siri	Predicted	21.7	78.3	11.595	25.562	41.901	92.375	53.4955	117.937	1128	1399	Sedentary	50.975	1.0495	48.9774	48.9822		0.9	1.1	3.159	3.159	15658
1922	39.69	Female	163	64.2	2035	General Population	operator	Siri	Predicted	20.6	79.4	11.003	24.257	42.487	93.667	53.4896	117.924	1141	1415	Sedentary	50.85	1.0519	48.8735	48.8363		0.9	1.1	3.159	3.159	15657.3
1923	37.84	Male	182	71.7	1027	General Population	operator	Siri	Predicted	21.1	78.9	16.699	36.816	62.492	137.77	79.191	174.586	1680	2923	Active	75.365	1.0508	72.8296	72.637		0.9	1.1	4.241	4.241	20038
1924	37.84	Male	182	71.7	1027	General Population	operator	Siri	Predicted	22.6	77.4	17.888	39.435	61.296	135.136	79.184	174.571	1654	2878	Active	75.599	1.0474	72.9724	72.9615		0.9	1.1	4.241	4.241	20037.3
1925	37.84	Male	182	71.7	1027	General Population	operator	Siri	Predicted	21.6	78.4	17.073	37.639	62.115	136.939	79.1874	174.578	1672	2909	Active	75.438	1.0497	72.7938	72.8171		0.9	1.1	4.241	4.241	20037.7
1926	37.84	Male	182	71.7	1027	General Population	operator	Siri	Predicted	22.2	77.8	17.613	38.83	61.564	135.725	79.1768	174.555	1660	2888	Active	75.537	1.0482	72.8279	72.982		0.9	1.1	4.241	4.241	20036.5
1927	37.84	Male	182	71.7	1027	General Population	operator	Siri	Predicted	21.9	78.1	17.322	38.188	61.855	136.367	79.1769	174.555	1666	2899	Active	75.478	1.049	72.5892	72.8418	72.8507	0.9	1.1	4.241	4.241	20036.5
1928	37.84	Male	182	71.7	1027	General Population	operator	Siri	Predicted	22	78	17.441	38.45	61.726	136.083	79.167	174.533	1663	2894	Active	75.493	1.0487	72.8077	72.9149		0.9	1.1	4.241	4.241	20035.5
1929	33.22	Male	170.5	67.1	1028	General Population	operator	Siri	Predicted	23.8	76.2	18.633	41.079	59.609	131.415	78.2421	172.494	1613	2807	Active	74.893	1.0447	72.5277	72.558		0.9	1.1	3.657	3.657	19014.2
1930	33.22	Male	170.5	67.1	1028	General Population	operator	Siri	Predicted	23.8	76.2	18.634	41.082	59.579	131.35	78.2136	172.431	1612	2805	Active	74.868	1.0447	72.7626	72.5059	72.5287	0.9	1.1	3.657	3.657	19011.3
1931	33.22	Male	170.5	67.1	1028	General Population	operator	Siri	Predicted	25	75	19.553	43.108	58.647	129.295	78.2007	172.403	1592	2770	Active	75.042	1.0421	72.67	72.7126		0.9	1.1	3.657	3.657	19010
1932	33.22	Male	170.5	67.1	1028	General Population	operator	Siri	Predicted	25.2	74.8	19.724	43.484	58.464	128.89	78.1879	172.375	1588	2763	Active	75.065	1.0416	72.6468	72.7817		0.9	1.1	3.657	3.657	19008.6
1933	33.22	Male	170.5	67.1	1028	General Population	operator	Siri	Predicted	25.2	74.8	19.731	43.5	58.459	128.88	78.1899	172.379	1588	2763	Active	75.068	1.0416	72.6249	72.81		0.9	1.1	3.657	3.657	19008.8
1934	33.22	Male	170.5	67.1	1028	General Population	operator	Siri	Predicted	25.5	74.5	19.968	44.022	58.215	128.342	78.1829	172.364	1583	2754	Active	75.109	1.0409	72.7541	72.7639		0.9	1.1	3.657	3.657	19008.1
1935	33.68	Male	178	70.1	1029	General Population	operator	Siri	Predicted	13.9	86.1	10.126	22.323	62.899	138.668	73.0245	160.992	1664	2895	Active	68.432	1.0671	65.9715	65.9005		0.9	1.1	4.015	4.015	19050
1936	33.68	Male	178	70.1	1029	General Population	operator	Siri	Predicted	12.8	87.2	9.322	20.552	63.692	140.416	73.0138	160.968	1681	2925	Active	68.259	1.0697	65.7751	65.7528		0.9	1.1	4.015	4.015	19048.8
1937	33.68	Male	178	70.1	1029	General Population	operator	Siri	Predicted	13.2	86.8	9.67	21.318	63.339	139.638	73.0082	160.955	1673	2911	Active	68.325	1.0685	65.8055	65.8527		0.9	1.1	4.015	4.015	19048.2
1938	33.68	Male	178	70.1	1029	General Population	operator	Siri	Predicted	14.4	85.6	10.52	23.192	62.479	137.742	72.9981	160.933	1654	2878	Active	68.487	1.0659	65.9557	66.0278		0.9	1.1	4.015	4.015	19047.1
1939	33.68	Male	178	70.1	1029	General Population	operator	Siri	Predicted	14.9	85.1	10.87	23.965	62.118	136.948	72.9888	160.913	1647	2866	Active	68.55	1.0648	66.0292	66.0792		0.9	1.1	4.015	4.015	19046
1940	33.68	Male	178	70.1	1029	General Population	operator	Siri	Predicted	14.3	85.7	10.44	23.017	62.548	137.894	72.9878	160.911	1656	2881	Active	68.462	1.0661	66.024	65.9088		0.9	1.1	4.015	4.015	19045.9
1941	20.28	Male	172.5	67.9	1030	General Population	operator	Siri	Predicted	15.5	84.5	9.726	21.442	52.901	116.627	62.627	138.069	1404	2920	Very Active	58.898	1.0633	56.6449	56.615		0.9	1.1	3.635	3.635	17444.6
1942	20.28	Male	172.5	67.9	1030	General Population	operator	Siri	Predicted	16.9	83.1	10.565	23.293	52.077	114.81	62.6422	138.102	1386	2883	Very Active	59.082	1.0603	56.8288	56.7979		0.9	1.1	3.635	3.635	17446.4
1943	20.28	Male	172.5	67.9	1030	General Population	operator	Siri	Predicted	17.1	82.9	10.704	23.599	51.936	114.499	62.6403	138.098	1383	2877	Very Active	59.108	1.0598	56.85	56.8294		0.9	1.1	3.635	3.635	17446.2
1944	20.28	Male	172.5	67.9	1030	General Population	operator	Siri	Predicted	16.6	83.4	10.427	22.989	52.204	115.089	62.631	138.078	1389	2889	Very Active	59.044	1.0608	56.9166	56.7294	56.8214	0.9	1.1	3.635	3.635	17445.1
1945	20.28	Male	172.5	67.9	1030	General Population	operator	Siri	Predicted	17.1	82.9	10.716	23.626	51.906	114.433	62.6222	138.058	1382	2875	Very Active	59.094	1.0597	56.8267	56.8248		0.9	1.1	3.635	3.635	17444.1
1946	20.28	Male	172.5	67.9	1030	General Population	operator	Siri	Predicted	16.6	83.4	10.376	22.874	52.242	115.174	62.6176	138.048	1390	2891	Very Active	59.021	1.0609	56.9247	56.7271	56.7784	0.9	1.1	3.635	3.635	17443.5
1947	34.76	Male	178	70.1	1031	General Population	operator	Siri	Predicted	21.4	78.6	16.966	37.403	62.391	137.548	79.3562	174.95	1678	2534	Low Activity	75.569	1.0501	73.0533	73.0226		0.9	1.1	4.024	4.024	19735.2
1948	34.76	Male	178	70.1	1031	General Population	operator	Siri	Predicted	21.6	78.4	17.129	37.764	62.22	137.172	79.3498	174.936	1674	2528	Low Activity	75.597	1.0496	73.1126	73.018		0.9	1.1	4.024	4.024	19734.6
1949	34.76	Male	178	70.1	1031	General Population	operator	Siri	Predicted	22	78	17.477	38.529	61.867	136.392	79.3432	174.922	1667	2517	Low Activity	75.661	1.0487	73.0951	73.1638		0.9	1.1	4.024	4.024	19733.9
1950	34.76	Male	178	70.1	1031	General Population	operator	Siri	Predicted	21.9	78.1	17.373	38.302	61.963	136.606	79.3368	174.908	1669	2520	Low Activity	75.634	1.049	73.0639	73.1417		0.9	1.1	4.024	4.024	19733.2
1951	34.76	Male	178	70.1	1031	General Population	operator	Siri	Predicted	21.7	78.3	17.231	37.987	62.095	136.897	79.3258	174.883	1672	2525	Low Activity	75.595	1.0493	72.993	73.3013	73.1352	0.9	1.1	4.024	4.024	19732
1952	34.76	Male	178	70.1	1031	General Population	operator	Siri	Predicted	20.6	79.4	16.366	36.08	62.957	138.796	79.3224	174.876	1690	2552	Low Activity	75.417	1.0518	72.839	72.9334		0.9	1.1	4.024	4.024	19731.7
1953	34.73	Male	181	71.3	1032	General Population	operator	Siri	Predicted	20.8	79.2	18.991	41.869	72.527	159.895	91.5184	201.764	1948	3390	Active	87.035	1.0515	84.9181	84.4433	84.3122	0.9	1.1	4.166	4.166	21223.9
1954	34.73	Male	181	71.3	1032	General Population	operator	Siri	Predicted	22.5	77.5	20.576	45.363	70.929	156.372	91.5055	201.735	1913	3329	Active	87.344	1.0476	84.695	84.6774		0.9	1.1	4.166	4.166	21222.6
1955	34.73	Male	181	71.3	1032	General Population	operator	Siri	Predicted	22.2	77.8	20.284	44.719	71.21	156.991	91.4945	201.711	1919	3339	Active	87.275	1.0484	85.0909	84.5761	84.6585	0.9	1.1	4.166	4.166	21221.5
1956	34.73	Male	181	71.3	1032	General Population	operator	Siri	Predicted	23.7	76.3	21.679	47.793	69.798	153.879	91.4769	201.672	1888	3285	Active	87.54	1.045	84.8125	84.9536		0.9	1.1	4.166	4.166	21219.8
1957	34.73	Male	181	71.3	1032	General Population	operator	Siri	Predicted	23.8	76.2	21.78	48.018	69.686	153.631	91.4663	201.649	1886	3282	Active	87.551	1.0447	84.8356	84.9525		0.9	1.1	4.166	4.166	21218.7
1958	34.73	Male	181	71.3	1032	General Population	operator	Siri	Predicted	24	76	21.973	48.442	69.488	153.194	91.4604	201.636	1882	3275	Active	87.585	1.0443	85.2388	84.9141	84.9411	0.9	1.1	4.166	4.166	21218.1
1959	31.79	Male	178	70.1	1033	General Population	operator	Siri	Predicted	17	83	13.762	30.339	67.027	147.77	80.7887	178.109	1785	3713	Very Active	76.224	1.0599	73.8014	73.5919		0.9	1.1	3.998	3.998	19885.9
1960	31.79	Male	178	70.1	1033	General Population	operator	Siri	Predicted	18.2	81.8	14.7	32.409	66.079	145.679	80.7791	178.087	1764	3669	Very Active	76.405	1.0572	73.828	73.9272		0.9	1.1	3.998	3.998	19884.9
1961	31.79	Male	178	70.1	1033	General Population	operator	Siri	Predicted	18.2	81.8	14.74	32.496	66.034	145.581	80.7744	178.077	1763	3667	Very Active	76.409	1.0571	73.9339	73.829		0.9	1.1	3.998	3.998	19884.4
1962	31.79	Male	178	70.1	1033	General Population	operator	Siri	Predicted	19.2	80.8	15.477	34.121	65.285	143.93	80.7622	178.05	1747	3634	Very Active	76.547	1.0551	74.0593	73.9791		0.9	1.1	3.998	3.998	19883.1
1963	31.79	Male	178	70.1	1033	General Population	operator	Siri	Predicted	19.3	80.7	15.574	34.335	65.181	143.698	80.7547	178.034	1745	3630	Very Active	76.56	1.0548	74.0981	73.966		0.9	1.1	3.998	3.998	19882.3
1964	31.79	Male	178	70.1	1033	General Population	operator	Siri	Predicted	19.6	80.4	15.803	34.841	64.947	143.183	80.7501	178.024	1739	3617	Very Active	76.602	1.0542	74.0983	74.0503		0.9	1.1	3.998	3.998	19881.8
1965	38.14	Female	177	69.7	2036	General Population	operator	Siri	Predicted	24.2	75.8	15.852	34.947	49.535	109.205	65.3865	144.152	1342	2040	Low Activity	62.645	1.0438	60.2684	60.4036		0.9	1.1	3.658	3.658	18102.1
1966	38.14	Female	177	69.7	2036	General Population	operator	Siri	Predicted	24.6	75.4	16.063	35.412	49.311	108.712	65.3735	144.124	1337	2032	Low Activity	62.675	1.043	60.2865	60.4472		0.9	1.1	3.658	3.658	18100.6
1967	38.14	Female	177	69.7	2036	General Population	operator	Siri	Predicted	24.7	75.3	16.139	35.58	49.231	108.536	65.3702	144.117	1335	2029	Low Activity	62.688	1.0428	60.3836	60.3749		0.9	1.1	3.658	3.658	18100.2
1968	38.14	Female	177	69.7	2036	General Population	operator	Siri	Predicted	24.4	75.6	15.949	35.163	49.416	108.943	65.3654	144.106	1339	2035	Low Activity	62.645	1.0434	60.3441	60.3291		0.9	1.1	3.658	3.658	18099.6
1969	38.14	Female	177	69.7	2036	General Population	operator	Siri	Predicted	24.9	75.1	16.256	35.838	49.107	108.263	65.3632	144.101	1333	2026	Low Activity	62.705	1.0424	60.3696	60.4235		0.9	1.1	3.658	3.658	18099.4
1970	38.14	Female	177	69.7	2036	General Population	operator	Siri	Predicted	23.4	76.6	15.263	33.648	50.087	110.424	65.3502	144.072	1354	2058	Low Activity	62.493	1.0457	60.2221	60.4272	60.1462	0.9	1.1	3.658	3.658	18097.8
1971	66.46	Female	163	64.2	2037	General Population	operator	Siri	Predicted	44	56	33.679	74.249	42.843	94.453	76.522	168.702	1241	1886	Low Activity	76.369	1.002	74.2401	74.2021		0.9	1.1	3.242	3.242	18231
1972	66.46	Female	163	64.2	2037	General Population	operator	Siri	Predicted	45.2	54.8	34.553	76.176	41.963	92.514	76.5163	168.69	1222	1857	Low Activity	76.541	0.9997	74.4447	74.3403		0.9	1.1	3.242	3.242	18230.5
1973	66.46	Female	163	64.2	2037	General Population	operator	Siri	Predicted	44.6	55.4	34.094	75.165	42.417	93.513	76.5114	168.679	1232	1873	Low Activity	76.444	1.0009	74.2952	74.2956		0.9	1.1	3.242	3.242	18230
1974	66.46	Female	163	64.2	2037	General Population	operator	Siri	Predicted	45.3	54.7	34.69	76.478	41.808	92.172	76.4983	168.65	1219	1853	Low Activity	76.552	0.9993	74.3699	74.4379		0.9	1.1	3.242	3.242	18228.6
1975	66.46	Female	163	64.2	2037	General Population	operator	Siri	Predicted	45.3	54.7	34.66	76.412	41.845	92.252	76.5051	168.665	1220	1854	Low Activity	76.552	0.9994	74.3163	74.4917		0.9	1.1	3.242	3.242	18229.3
1976	66.46	Female	163	64.2	2037	General Population	operator	Siri	Predicted	45.2	54.8	34.541	76.15	41.958	92.502	76.4995	168.652	1222	1857	Low Activity	76.523	0.9997	74.3289	74.4208		0.9	1.1	3.242	3.242	18228.8
1977	39.14	Male	192	75.6	1034	General Population	operator	Siri	Predicted	18.3	81.7	14.278	31.478	63.902	140.879	78.1798	172.357	1706	2968	Active	73.957	1.0571	71.0544	71.145		0.9	1.1	4.725	4.725	20716.9
1978	39.14	Male	192	75.6	1034	General Population	operator	Siri	Predicted	18.5	81.5	14.488	31.942	63.684	140.399	78.1725	172.341	1702	2961	Active	73.993	1.0565	71.0579	71.2133		0.9	1.1	4.725	4.725	20716.1
1979	39.14	Male	192	75.6	1034	General Population	operator	Siri	Predicted	17.3	82.7	13.505	29.774	64.66	142.552	78.1655	172.325	1723	2998	Active	73.788	1.0593	70.834	71.0272		0.9	1.1	4.725	4.725	20715.3
1980	39.14	Male	192	75.6	1034	General Population	operator	Siri	Predicted	18.5	81.5	14.427	31.805	63.733	140.507	78.1596	172.312	1703	2963	Active	73.969	1.0567	71.2129	71.0099		0.9	1.1	4.725	4.725	20714.6
1981	39.14	Male	192	75.6	1034	General Population	operator	Siri	Predicted	18.6	81.4	14.5	31.968	63.654	140.334	78.1545	172.301	1701	2960	Active	73.979	1.0564	71.1131	71.1304		0.9	1.1	4.725	4.725	20714.1
1982	39.14	Male	192	75.6	1034	General Population	operator	Siri	Predicted	18.2	81.8	14.195	31.294	63.957	141.001	78.1518	172.295	1707	2970	Active	73.915	1.0573	70.8705	71.1063	71.0087	0.9	1.1	4.725	4.725	20713.7
1983	26.43	Male	182.5	71.9	1035	General Population	operator	Siri	Predicted	11.8	88.2	9.93	21.891	73.887	162.892	83.8166	184.784	1946	3386	Active	78.203	1.0718	75.6805	75.4747		0.9	1.1	4.162	4.162	20568.2
1984	26.43	Male	182.5	71.9	1035	General Population	operator	Siri	Predicted	13.3	86.7	11.16	24.605	72.609	160.075	83.7694	184.68	1918	3337	Active	78.409	1.0684	75.7959	75.7712		0.9	1.1	4.162	4.162	20563.3
1985	26.43	Male	182.5	71.9	1035	General Population	operator	Siri	Predicted	12.5	87.5	10.489	23.125	73.279	161.553	83.7684	184.678	1933	3363	Active	78.272	1.0702	75.5874	75.7069		0.9	1.1	4.162	4.162	20563.2
1986	26.43	Male	182.5	71.9	1035	General Population	operator	Siri	Predicted	13.3	86.7	11.152	24.587	72.605	160.068	83.7578	184.654	1918	3337	Active	78.396	1.0684	75.7191	75.8238		0.9	1.1	4.162	4.162	20562.1
1987	26.43	Male	182.5	71.9	1035	General Population	operator	Siri	Predicted	14	86	11.715	25.827	72.019	158.775	83.7343	184.602	1905	3315	Active	78.489	1.0668	75.9552	75.7724		0.9	1.1	4.162	4.162	20559.7
1988	26.43	Male	182.5	71.9	1035	General Population	operator	Siri	Predicted	13.4	86.6	11.185	24.658	72.535	159.913	83.7197	184.57	1917	3336	Active	78.368	1.0683	76.1708	75.804	75.683	0.9	1.1	4.162	4.162	20558.1
1995	34.29	Male	169.5	66.7	1036	General Population	operator	Siri	Predicted	8.6	91.4	5.317	11.721	56.224	123.952	61.5404	135.673	1472	2561	Active	57.02	1.0793	54.778	54.7699		0.9	1.1	3.619	3.619	17096.5
1996	34.29	Male	169.5	66.7	1036	General Population	operator	Siri	Predicted	8.5	91.5	5.206	11.477	56.329	124.183	61.5343	135.66	1474	2565	Active	56.992	1.0797	54.712	54.7799		0.9	1.1	3.619	3.619	17095.8
1997	34.29	Male	169.5	66.7	1036	General Population	operator	Siri	Predicted	8.2	91.8	5.045	11.123	56.475	124.507	61.5208	135.63	1477	2570	Active	56.947	1.0803	54.7183	54.6844		0.9	1.1	3.619	3.619	17094.2
1998	34.29	Male	169.5	66.7	1036	General Population	operator	Siri	Predicted	8.6	91.4	5.305	11.696	56.215	123.932	61.5199	135.628	1472	2561	Active	56.999	1.0793	54.7762	54.7299		0.9	1.1	3.619	3.619	17094.1
1999	34.29	Male	169.5	66.7	1036	General Population	operator	Siri	Predicted	9.4	90.6	5.762	12.703	55.757	122.923	61.519	135.626	1462	2544	Active	57.09	1.0776	54.8342	54.8548		0.9	1.1	3.619	3.619	17094
2000	34.29	Male	169.5	66.7	1036	General Population	operator	Siri	Predicted	9.2	90.8	5.674	12.508	55.84	123.106	61.5137	135.614	1464	2547	Active	57.068	1.0779	55.0716	54.8342	54.8096	0.9	1.1	3.619	3.619	17093.4
2079	25.19	Male	171.5	67.5	1037	General Population	operator	Siri	Predicted	17.9	82.1	13.113	28.909	60.227	132.777	73.3394	161.686	1607	2796	Active	69.321	1.058	67.013	66.9893		0.9	1.1	3.631	3.631	18577
2080	25.19	Male	171.5	67.5	1037	General Population	operator	Siri	Predicted	18.9	81.1	13.824	30.476	59.489	131.15	73.3122	161.626	1591	2768	Active	69.44	1.0558	67.0358	67.2043		0.9	1.1	3.631	3.631	18574.1
2081	25.19	Male	171.5	67.5	1037	General Population	operator	Siri	Predicted	19.1	80.9	13.978	30.816	59.338	130.818	73.3163	161.635	1587	2761	Active	69.475	1.0553	67.1766	67.1333		0.9	1.1	3.631	3.631	18574.5
2082	25.19	Male	171.5	67.5	1037	General Population	operator	Siri	Predicted	19.1	80.9	14.033	30.938	59.274	130.677	73.307	161.614	1586	2760	Active	69.478	1.0551	67.1084	67.207		0.9	1.1	3.631	3.631	18573.5
2083	25.19	Male	171.5	67.5	1037	General Population	operator	Siri	Predicted	19.7	80.3	14.466	31.892	58.837	129.714	73.3032	161.606	1576	2742	Active	69.562	1.0538	67.2988	67.1848		0.9	1.1	3.631	3.631	18573.1
2084	25.19	Male	171.5	67.5	1037	General Population	operator	Siri	Predicted	19.4	80.6	14.201	31.308	59.1	130.294	73.3012	161.602	1582	2753	Active	69.506	1.0546	67.1847	67.1882		0.9	1.1	3.631	3.631	18572.9
2085	28.53	Female	170.5	67.1	2038	General Population	operator	Siri	Predicted	24.6	75.4	13.453	29.66	41.285	91.019	54.7387	120.678	1120	1949	Active	52.48	1.043	50.3291	50.3901		0.9	1.1	3.394	3.394	16335.8
2086	28.53	Female	170.5	67.1	2038	General Population	operator	Siri	Predicted	24.6	75.4	13.462	29.679	41.27	90.985	54.7319	120.663	1119	1947	Active	52.476	1.043	50.4348	50.2758		0.9	1.1	3.394	3.394	16335
2087	28.53	Female	170.5	67.1	2038	General Population	operator	Siri	Predicted	24.1	75.9	13.172	29.039	41.557	91.617	54.7284	120.655	1125	1957	Active	52.414	1.0442	50.3565	50.2303		0.9	1.1	3.394	3.394	16334.5
2088	28.53	Female	170.5	67.1	2038	General Population	operator	Siri	Predicted	23.6	76.4	12.936	28.519	41.791	92.133	54.7271	120.653	1130	1966	Active	52.365	1.0451	50.2722	50.2171		0.9	1.1	3.394	3.394	16334.4
2089	28.53	Female	170.5	67.1	2038	General Population	operator	Siri	Predicted	23.3	76.7	12.774	28.162	41.954	92.494	54.7284	120.655	1134	1973	Active	52.334	1.0458	50.1487	50.2774		0.9	1.1	3.394	3.394	16334.5
2090	28.53	Female	170.5	67.1	2038	General Population	operator	Siri	Predicted	23.4	76.6	12.806	28.232	41.919	92.415	54.7246	120.647	1133	1971	Active	52.337	1.0456	50.2274	50.2048		0.9	1.1	3.394	3.394	16334.1
2091	35.99	Female	158	62.2	2039	General Population	operator	Siri	Predicted	30.7	69.3	20.849	45.963	47.071	103.773	67.9195	149.737	1299	2260	Active	65.957	1.0298	63.9763	63.9808		0.9	1.1	2.968	2.968	16943
2092	35.99	Female	158	62.2	2039	General Population	operator	Siri	Predicted	31.9	68.1	21.631	47.688	46.28	102.029	67.9106	149.717	1281	2229	Active	66.107	1.0273	64.1651	64.092		0.9	1.1	2.968	2.968	16942.1
2093	35.99	Female	158	62.2	2039	General Population	operator	Siri	Predicted	33.3	66.7	22.616	49.861	45.285	99.837	67.9018	149.698	1260	2192	Active	66.298	1.0242	64.3283	64.3112		0.9	1.1	2.968	2.968	16941.1
2094	35.99	Female	158	62.2	2039	General Population	operator	Siri	Predicted	33.2	66.8	22.554	49.723	45.337	99.952	67.8912	149.675	1261	2194	Active	66.276	1.0244	64.3696	64.2254		0.9	1.1	2.968	2.968	16940
2095	35.99	Female	158	62.2	2039	General Population	operator	Siri	Predicted	34.2	65.8	23.24	51.235	44.642	98.418	67.8815	149.653	1246	2168	Active	66.405	1.0222	64.4582	64.3964		0.9	1.1	2.968	2.968	16939
2096	35.99	Female	158	62.2	2039	General Population	operator	Siri	Predicted	33.7	66.3	22.867	50.413	44.992	99.191	67.8592	149.604	1253	2180	Active	66.31	1.0234	64.32	64.3436		0.9	1.1	2.968	2.968	16936.6
2097	33.2	Male	186	73.2	1038	General Population	operator	Siri	Predicted	43.1	56.9	67.219	148.193	88.827	195.83	156.046	344.023	2563	4460	Active	155.44	1.0039	152.607	152.226		0.9	1.1	4.388	4.388	27157.9
2098	33.2	Male	186	73.2	1038	General Population	operator	Siri	Predicted	42.6	57.4	66.462	146.525	89.566	197.459	156.028	343.984	2579	4487	Active	155.271	1.0049	152.206	152.289		0.9	1.1	4.388	4.388	27156.6
2099	33.2	Male	186	73.2	1038	General Population	operator	Siri	Predicted	44.2	55.8	68.956	152.022	87.071	191.959	156.027	343.981	2525	4393	Active	155.773	1.0016	152.782	152.718		0.9	1.1	4.388	4.388	27156.5
2100	33.2	Male	186	73.2	1038	General Population	operator	Siri	Predicted	43.9	56.1	68.455	150.917	87.547	193.007	156.001	343.924	2535	4411	Active	155.649	1.0023	152.752	152.498		0.9	1.1	4.388	4.388	27154.6
2101	33.2	Male	186	73.2	1038	General Population	operator	Siri	Predicted	44.3	55.7	69.112	152.366	86.886	191.55	155.998	343.917	2521	4387	Active	155.778	1.0014	152.836	152.675		0.9	1.1	4.388	4.388	27154.3
2102	33.2	Male	186	73.2	1038	General Population	operator	Siri	Predicted	44.8	55.2	69.831	153.95	86.159	189.947	155.989	343.898	2505	4359	Active	155.916	1.0005	152.999	152.786		0.9	1.1	4.388	4.388	27153.7
2103	54.41	Female	154.5	60.8	2040	General Population	operator	Siri	Predicted	41.2	58.8	28.82	63.537	41.118	90.649	69.9377	154.186	1177	2048	Active	69.402	1.0077	67.5201	67.3884		0.9	1.1	2.899	2.899	16878.8
2104	54.41	Female	154.5	60.8	2040	General Population	operator	Siri	Predicted	41.8	58.2	29.267	64.522	40.685	89.696	69.9521	154.218	1168	2032	Active	69.505	1.0064	67.552	67.5629		0.9	1.1	2.899	2.899	16880.3
2105	54.41	Female	154.5	60.8	2040	General Population	operator	Siri	Predicted	42.4	57.6	29.657	65.382	40.268	88.777	69.9254	154.159	1159	2017	Active	69.56	1.0053	67.6126	67.6118		0.9	1.1	2.899	2.899	16877.5
2106	54.41	Female	154.5	60.8	2040	General Population	operator	Siri	Predicted	42.2	57.8	29.485	65.004	40.429	89.13	69.9141	154.134	1162	2022	Active	69.515	1.0057	67.5422	67.5923		0.9	1.1	2.899	2.899	16876.4
2107	54.41	Female	154.5	60.8	2040	General Population	operator	Siri	Predicted	43	57	30.076	66.305	39.84	87.833	69.9158	154.138	1149	1999	Active	69.636	1.004	67.7151	67.6612		0.9	1.1	2.899	2.899	16876.6
2108	54.41	Female	154.5	60.8	2040	General Population	operator	Siri	Predicted	42.6	57.4	29.766	65.623	40.142	88.498	69.9083	154.121	1156	2011	Active	69.566	1.0049	67.613	67.6247		0.9	1.1	2.899	2.899	16875.8
2109	37.54	Male	186	73.2	1039	General Population	operator	Siri	Predicted	31	69	32.525	71.706	72.43	159.681	104.956	231.388	2000	3480	Active	101.985	1.0291	99.19	99.0955		0.9	1.1	4.427	4.427	22945.1
2110	37.54	Male	186	73.2	1039	General Population	operator	Siri	Predicted	31.9	68.1	33.431	73.702	71.515	157.663	104.945	231.365	1980	3445	Active	102.159	1.0273	99.664	99.3488	99.2838	0.9	1.1	4.427	4.427	22944.2
2111	37.54	Male	186	73.2	1039	General Population	operator	Siri	Predicted	32.3	67.7	33.883	74.699	71.051	156.64	104.934	231.339	1970	3428	Active	102.239	1.0264	99.5336	99.2603		0.9	1.1	4.427	4.427	22943.1
2112	37.54	Male	186	73.2	1039	General Population	operator	Siri	Predicted	32.1	67.9	33.689	74.272	71.239	157.056	104.929	231.328	1974	3435	Active	102.196	1.0267	99.3511	99.3556		0.9	1.1	4.427	4.427	22942.6
2113	37.54	Male	186	73.2	1039	General Population	operator	Siri	Predicted	31.1	68.9	32.616	71.905	72.287	159.365	104.903	231.271	1997	3475	Active	101.955	1.0289	100.548	99.1189	99.1068	0.9	1.1	4.427	4.427	22940.2
2114	37.54	Male	186	73.2	1039	General Population	operator	Siri	Predicted	32.5	67.5	34.046	75.058	70.849	156.195	104.894	231.252	1965	3419	Active	102.236	1.026	99.4108	99.3778		0.9	1.1	4.427	4.427	22939.4
2115	48.79	Female	165	65	2041	General Population	operator	Siri	Predicted	38.1	61.9	34.495	76.049	56.051	123.572	90.5464	199.621	1585	2758	Active	89.284	1.0141	87.1425	86.9722		0.9	1.1	3.259	3.259	19756.6
2116	48.79	Female	165	65	2041	General Population	operator	Siri	Predicted	39.1	60.9	35.434	78.118	55.102	121.479	90.5355	199.597	1565	2723	Active	89.463	1.012	87.2348	87.2392		0.9	1.1	3.259	3.259	19755.6
2117	48.79	Female	165	65	2041	General Population	operator	Siri	Predicted	38.1	61.9	34.47	75.993	56.069	123.612	90.539	199.604	1586	2760	Active	89.272	1.0142	87.0298	87.0612		0.9	1.1	3.259	3.259	19755.9
2118	48.79	Female	165	65	2041	General Population	operator	Siri	Predicted	38.5	61.5	34.883	76.903	55.625	122.632	90.5077	199.535	1576	2742	Active	89.327	1.0132	86.9952	87.2059		0.9	1.1	3.259	3.259	19753
2119	48.79	Female	165	65	2041	General Population	operator	Siri	Predicted	38.7	61.3	34.984	77.125	55.52	122.401	90.5038	199.527	1574	2739	Active	89.344	1.013	87.1058	87.129		0.9	1.1	3.259	3.259	19752.7
2120	48.79	Female	165	65	2041	General Population	operator	Siri	Predicted	38.7	61.3	35.023	77.212	55.473	122.297	90.4957	199.509	1573	2737	Active	89.344	1.0129	87.1731	87.0628		0.9	1.1	3.259	3.259	19751.9
2121	37.66	Male	170	66.9	1040	General Population	operator	Siri	Predicted	18.7	81.3	14.564	32.108	63.201	139.334	77.7648	171.442	1689	2939	Active	73.637	1.056	71.2468	71.3222		0.9	1.1	3.673	3.673	18924.5
2122	37.66	Male	170	66.9	1040	General Population	operator	Siri	Predicted	17.7	82.3	13.749	30.311	64.005	141.108	77.7544	171.419	1707	2970	Active	73.463	1.0584	71.149	71.0719		0.9	1.1	3.673	3.673	18923.4
2123	37.66	Male	170	66.9	1040	General Population	operator	Siri	Predicted	17.7	82.3	13.794	30.411	63.95	140.985	77.7437	171.396	1706	2968	Active	73.463	1.0583	71.0796	71.1403		0.9	1.1	3.673	3.673	18922.3
2124	37.66	Male	170	66.9	1040	General Population	operator	Siri	Predicted	17.6	82.4	13.683	30.166	64.053	141.213	77.7361	171.379	1708	2972	Active	73.433	1.0586	71.067	71.0943		0.9	1.1	3.673	3.673	18921.5
2125	37.66	Male	170	66.9	1040	General Population	operator	Siri	Predicted	17.8	82.2	13.809	30.444	63.923	140.926	77.7323	171.37	1705	2967	Active	73.455	1.0582	71.1816	71.0237		0.9	1.1	3.673	3.673	18921.1
2126	37.66	Male	170	66.9	1040	General Population	operator	Siri	Predicted	19.2	80.8	14.905	32.86	62.819	138.493	77.7245	171.353	1681	2925	Active	73.67	1.055	71.3543	71.2796		0.9	1.1	3.673	3.673	18920.3
2127	33.07	Male	170	66.9	1041	General Population	operator	Siri	Predicted	13.4	86.6	8.738	19.263	56.424	124.393	65.1614	143.656	1491	2251	Low Activity	61.003	1.0682	58.8088	58.6519		0.9	1.1	3.632	3.632	17554.5
2128	33.07	Male	170	66.9	1041	General Population	operator	Siri	Predicted	13.8	86.2	9.023	19.893	56.138	123.763	65.1611	143.656	1485	2242	Low Activity	61.06	1.0672	58.7572	58.8184		0.9	1.1	3.632	3.632	17554.4
2129	33.07	Male	170	66.9	1041	General Population	operator	Siri	Predicted	13.6	86.4	8.891	19.602	56.261	124.034	65.1525	143.637	1487	2245	Low Activity	61.026	1.0676	58.5512	58.7923	58.7145	0.9	1.1	3.632	3.632	17553.4
2130	33.07	Male	170	66.9	1041	General Population	operator	Siri	Predicted	13	87	8.446	18.62	56.702	125.006	65.1476	143.626	1497	2260	Low Activity	60.931	1.0692	58.8115	58.6164	58.7016	0.9	1.1	3.632	3.632	17552.9
2131	33.07	Male	170	66.9	1041	General Population	operator	Siri	Predicted	14	86	9.118	20.101	56.024	123.511	65.1413	143.612	1482	2238	Low Activity	61.061	1.0668	58.7979	58.7802		0.9	1.1	3.632	3.632	17552.2
2132	33.07	Male	170	66.9	1041	General Population	operator	Siri	Predicted	13.7	86.3	8.902	19.625	56.241	123.99	65.1423	143.614	1487	2245	Low Activity	61.019	1.0676	58.9493	58.7533	58.7392	0.9	1.1	3.632	3.632	17552.3
2133	36	Female	163	64.2	2042	General Population	operator	Siri	Predicted	13.5	86.5	10.68	23.544	68.243	150.449	78.9222	173.994	1804	3139	Active	73.905	1.0679	71.8474	71.7192		0.9	1.1	3.148	3.148	18471.9
2134	36	Female	163	64.2	2042	General Population	operator	Siri	Predicted	12.6	87.4	9.941	21.917	68.964	152.039	78.9051	173.956	1819	3165	Active	73.74	1.07	71.6898	71.5476		0.9	1.1	3.148	3.148	18470.2
2135	36	Female	163	64.2	2042	General Population	operator	Siri	Predicted	10.6	89.4	8.385	18.486	70.507	155.441	78.8922	173.928	1853	3224	Active	73.414	1.0746	71.6313	71.2182	71.3671	0.9	1.1	3.148	3.148	18468.9
2136	36	Female	163	64.2	2042	General Population	operator	Siri	Predicted	10.9	89.1	8.591	18.94	70.287	154.957	78.8782	173.897	1848	3216	Active	73.443	1.074	71.2902	71.5244	71.3529	0.9	1.1	3.148	3.148	18467.5
2137	36	Female	163	64.2	2042	General Population	operator	Siri	Predicted	10.9	89.1	8.621	19.006	70.241	154.854	78.8618	173.861	1847	3214	Active	73.434	1.0739	71.2994	71.3263		0.9	1.1	3.148	3.148	18465.9
2138	36	Female	163	64.2	2042	General Population	operator	Siri	Predicted	13	87	10.225	22.542	68.622	151.286	78.8473	173.829	1812	3153	Active	73.745	1.0692	71.659	71.5883		0.9	1.1	3.148	3.148	18464.5
2139	34.43	Male	188	74	1042	General Population	operator	Siri	Predicted	17.3	82.7	14.82	32.672	70.723	155.917	85.5427	188.589	1885	3280	Active	80.76	1.0592	77.9429	78.0024		0.9	1.1	4.494	4.494	21198.7
2140	34.43	Male	188	74	1042	General Population	operator	Siri	Predicted	16.6	83.4	14.232	31.376	71.309	157.209	85.5404	188.584	1897	3301	Active	80.639	1.0608	77.7786	77.9248		0.9	1.1	4.494	4.494	21198.4
2141	34.43	Male	188	74	1042	General Population	operator	Siri	Predicted	17.2	82.8	14.734	32.483	70.794	156.074	85.5281	188.557	1886	3282	Active	80.729	1.0594	77.9837	77.9005		0.9	1.1	4.494	4.494	21197.1
2142	34.43	Male	188	74	1042	General Population	operator	Siri	Predicted	16.6	83.4	14.208	31.324	71.314	157.219	85.5218	188.543	1897	3301	Active	80.617	1.0608	77.7247	77.9356		0.9	1.1	4.494	4.494	21196.5
2143	34.43	Male	188	74	1042	General Population	operator	Siri	Predicted	17.8	82.2	15.26	33.643	70.262	154.9	85.5216	188.543	1874	3261	Active	80.83	1.058	78.0542	78.0308		0.9	1.1	4.494	4.494	21196.4
2144	34.43	Male	188	74	1042	General Population	operator	Siri	Predicted	18.5	81.5	15.796	34.825	69.721	153.709	85.5176	188.534	1863	3242	Active	80.935	1.0566	78.2644	78.0301		0.9	1.1	4.494	4.494	21196
2145	41.91	Male	185	72.8	1043	General Population	operator	Siri	Predicted	30.4	69.6	37.87	83.489	86.788	191.334	124.657	274.823	2392	4162	Active	120.975	1.0304	118.196	117.923		0.9	1.1	4.419	4.419	24589.3
2146	41.91	Male	185	72.8	1043	General Population	operator	Siri	Predicted	30.2	69.8	37.665	83.038	86.987	191.774	124.653	274.812	2396	4169	Active	120.93	1.0308	118.19	117.838		0.9	1.1	4.419	4.419	24588.9
2147	41.91	Male	185	72.8	1043	General Population	operator	Siri	Predicted	29.9	70.1	37.229	82.075	87.411	192.709	124.64	274.784	2406	4186	Active	120.83	1.0315	117.938	117.89		0.9	1.1	4.419	4.419	24587.8
2148	41.91	Male	185	72.8	1043	General Population	operator	Siri	Predicted	29.4	70.6	36.592	80.673	88.037	194.088	124.629	274.761	2419	4209	Active	120.692	1.0326	118.255	117.647	117.905	0.9	1.1	4.419	4.419	24586.9
2149	41.91	Male	185	72.8	1043	General Population	operator	Siri	Predicted	30.8	69.2	38.367	84.585	86.256	190.162	124.623	274.747	2380	4141	Active	121.045	1.0296	118.146	118.111		0.9	1.1	4.419	4.419	24586.4
2150	41.91	Male	185	72.8	1043	General Population	operator	Siri	Predicted	31.6	68.4	39.357	86.767	85.252	187.948	124.609	274.715	2359	4105	Active	121.231	1.0279	118.396	118.236		0.9	1.1	4.419	4.419	24585.2
2151	30.86	Male	184.5	72.6	1044	General Population	operator	Siri	Predicted	13.5	86.5	11.429	25.196	73.394	161.806	84.8227	187.002	1940	3376	Active	79.42	1.068	76.6578	76.7998		0.9	1.1	4.296	4.296	20836.8
2152	30.86	Male	184.5	72.6	1044	General Population	operator	Siri	Predicted	13.7	86.3	11.631	25.643	73.182	161.338	84.8131	186.981	1935	3367	Active	79.453	1.0675	76.6932	76.829		0.9	1.1	4.296	4.296	20835.8
2153	30.86	Male	184.5	72.6	1044	General Population	operator	Siri	Predicted	14.7	85.3	12.501	27.561	72.308	159.413	84.8098	186.974	1916	3985	Very Active	79.625	1.0651	77.0108	76.8569		0.9	1.1	4.296	4.296	20835.5
2154	30.86	Male	184.5	72.6	1044	General Population	operator	Siri	Predicted	13.6	86.4	11.565	25.496	73.238	161.462	84.8025	186.957	1936	4027	Very Active	79.429	1.0676	76.7811	76.6949		0.9	1.1	4.296	4.296	20834.7
2155	30.86	Male	184.5	72.6	1044	General Population	operator	Siri	Predicted	13.3	86.7	11.27	24.847	73.526	162.098	84.7966	186.944	1943	3381	Active	79.365	1.0684	76.6688	76.6776		0.9	1.1	4.296	4.296	20834.1
2156	30.86	Male	184.5	72.6	1044	General Population	operator	Siri	Predicted	12.8	87.2	10.891	24.01	73.9	162.921	84.7905	186.931	1951	3395	Active	79.282	1.0695	76.808	76.5544	76.6277	0.9	1.1	4.296	4.296	20833.5
2157	29.37	Male	184	72.4	1045	General Population	operator	Siri	Predicted	15.5	84.5	13.073	28.821	71.173	156.91	84.2462	185.731	1889	3287	Active	79.228	1.0633	76.2645	76.6226	76.4903	0.9	1.1	4.259	4.259	20735.7
2158	29.37	Male	184	72.4	1045	General Population	operator	Siri	Predicted	14.9	85.1	12.565	27.702	71.669	158.004	84.2349	185.706	1900	3306	Active	79.116	1.0647	76.3929	76.6569	76.4945	0.9	1.1	4.259	4.259	20734.5
2159	29.37	Male	184	72.4	1045	General Population	operator	Siri	Predicted	16.1	83.9	13.558	29.89	70.662	155.784	84.2202	185.674	1878	3268	Active	79.303	1.062	76.6428	76.6189		0.9	1.1	4.259	4.259	20732.9
2160	29.37	Male	184	72.4	1045	General Population	operator	Siri	Predicted	15	85	12.651	27.891	71.563	157.769	84.2138	185.66	1897	3301	Active	79.114	1.0645	76.3342	76.5497		0.9	1.1	4.259	4.259	20732.3
2161	29.37	Male	184	72.4	1045	General Population	operator	Siri	Predicted	14.8	85.2	12.492	27.539	71.716	158.108	84.2081	185.647	1901	3308	Active	79.076	1.0649	76.3364	76.4728		0.9	1.1	4.259	4.259	20731.7
2162	29.37	Male	184	72.4	1045	General Population	operator	Siri	Predicted	14.8	85.2	12.444	27.435	71.761	158.206	84.2055	185.641	1902	3309	Active	79.064	1.065	76.3033	76.4819		0.9	1.1	4.259	4.259	20731.4
2163	23.55	Female	168.3	66.3	2043	General Population	operator	Siri	Predicted	19.2	80.8	11.375	25.077	47.859	105.51	59.2333	130.587	1281	2229	Active	56.146	1.055	53.8766	54.0688	54.0211	0.9	1.1	3.3	3.3	16734.7
2164	23.55	Female	168.3	66.3	2043	General Population	operator	Siri	Predicted	19.6	80.4	11.623	25.624	47.604	104.948	59.2269	130.573	1275	2218	Active	56.191	1.054	53.8804	54.0912	54.0875	0.9	1.1	3.3	3.3	16733.9
2165	23.55	Female	168.3	66.3	2043	General Population	operator	Siri	Predicted	18.2	81.8	10.767	23.738	48.46	106.836	59.2271	130.573	1294	2252	Active	56.018	1.0573	53.9249	53.9084		0.9	1.1	3.3	3.3	16734
2166	23.55	Female	168.3	66.3	2043	General Population	operator	Siri	Predicted	20.2	79.8	11.979	26.41	47.242	104.15	59.221	130.56	1267	2205	Active	56.257	1.0527	53.7859	54.1463	54.1656	0.9	1.1	3.3	3.3	16733.2
2167	23.55	Female	168.3	66.3	2043	General Population	operator	Siri	Predicted	18.7	81.3	11.069	24.403	48.151	106.155	59.22	130.558	1287	2239	Active	56.073	1.0561	54.1751	54.0113	53.9312	0.9	1.1	3.3	3.3	16733.1
2168	23.55	Female	168.3	66.3	2043	General Population	operator	Siri	Predicted	18.4	81.6	10.919	24.071	48.299	106.481	59.2175	130.552	1290	2245	Active	56.04	1.0567	53.9524	54.1616	53.9247	0.9	1.1	3.3	3.3	16732.8
2169	24.1	Female	159	62.6	2044	General Population	operator	Siri	Predicted	20	80	12.553	27.675	50.159	110.583	62.7128	138.258	1345	2784	Very Active	59.548	1.0532	57.5873	57.5979		0.9	1.1	2.967	2.967	16453.4
2170	24.1	Female	159	62.6	2044	General Population	operator	Siri	Predicted	18.3	81.7	11.457	25.259	51.267	113.023	62.7239	138.283	1369	2834	Very Active	59.336	1.0571	56.9932	57.3089	57.4536	0.9	1.1	2.967	2.967	16454.6
2171	24.1	Female	159	62.6	2044	General Population	operator	Siri	Predicted	18.3	81.7	11.469	25.285	51.242	112.969	62.7109	138.254	1368	2832	Very Active	59.327	1.057	57.3008	57.7294	57.4429	0.9	1.1	2.967	2.967	16453.2
2172	24.1	Female	159	62.6	2044	General Population	operator	Siri	Predicted	20.6	79.4	12.911	28.464	49.793	109.775	62.7043	138.239	1337	2768	Very Active	59.612	1.0519	57.4354	57.703	57.6115	0.9	1.1	2.967	2.967	16452.5
2173	24.1	Female	159	62.6	2044	General Population	operator	Siri	Predicted	19.2	80.8	12.062	26.591	50.639	111.639	62.7001	138.23	1355	2805	Very Active	59.437	1.0549	57.3015	57.5255	57.438	0.9	1.1	2.967	2.967	16452
2174	24.1	Female	159	62.6	2044	General Population	operator	Siri	Predicted	17.2	82.8	10.79	23.788	51.895	114.409	62.6849	138.197	1382	2861	Very Active	59.166	1.0595	57.1368	57.2855		0.9	1.1	2.967	2.967	16450.3
2175	25.42	Female	165	65	2045	General Population	operator	Siri	Predicted	31	69	22.651	49.938	50.433	111.185	73.0843	161.123	1393	2424	Active	71.016	1.0291	68.8459	68.9526		0.9	1.1	3.187	3.187	18037.1
2176	25.42	Female	165	65	2045	General Population	operator	Siri	Predicted	32.4	67.6	23.67	52.184	49.41	108.931	73.0802	161.114	1370	2384	Active	71.218	1.0261	69.1533	68.903	69.0495	0.9	1.1	3.187	3.187	18036.7
2177	25.42	Female	165	65	2045	General Population	operator	Siri	Predicted	31.6	68.4	23.062	50.843	50.007	110.248	73.0695	161.091	1383	2406	Active	71.086	1.0279	68.9558	68.9819		0.9	1.1	3.187	3.187	18035.6
2178	25.42	Female	165	65	2045	General Population	operator	Siri	Predicted	31.6	68.4	23.096	50.917	49.975	110.175	73.0703	161.092	1383	2406	Active	71.093	1.0278	68.9789	68.9738		0.9	1.1	3.187	3.187	18035.7
2179	25.42	Female	165	65	2045	General Population	operator	Siri	Predicted	31.3	68.7	22.895	50.475	50.178	110.624	73.0735	161.099	1387	2413	Active	71.056	1.0284	68.9776	69.2495	68.8999	0.9	1.1	3.187	3.187	18036
2180	25.42	Female	165	65	2045	General Population	operator	Siri	Predicted	31.7	68.3	23.154	51.046	49.91	110.032	73.0634	161.077	1381	2403	Active	71.099	1.0276	69.0161	68.9477		0.9	1.1	3.187	3.187	18034.9
2181	34.8	Female	167	65.7	2046	General Population	operator	Siri	Predicted	17.2	82.8	11.008	24.267	52.916	116.661	63.924	140.928	1410	2453	Active	60.337	1.0595	58.2974	58.1399		0.9	1.1	3.288	3.288	17188.7
2182	34.8	Female	167	65.7	2046	General Population	operator	Siri	Predicted	22.5	77.5	14.399	31.743	49.533	109.201	63.9315	140.945	1336	2325	Active	61.028	1.0476	58.9513	59.256	58.8696	0.9	1.1	3.288	3.288	17189.6
2183	34.8	Female	167	65.7	2046	General Population	operator	Siri	Predicted	18.4	81.6	11.751	25.907	52.166	115.006	63.917	140.913	1393	2424	Active	60.48	1.0568	58.4383	58.7726	58.2868	0.9	1.1	3.288	3.288	17187.9
2184	34.8	Female	167	65.7	2046	General Population	operator	Siri	Predicted	20.5	79.5	13.078	28.833	50.829	112.059	63.9075	140.892	1364	2373	Active	60.74	1.0522	58.6553	58.5888		0.9	1.1	3.288	3.288	17186.8
2185	34.8	Female	167	65.7	2046	General Population	operator	Siri	Predicted	18.9	81.1	12.063	26.593	51.836	114.278	63.8983	140.872	1386	2412	Active	60.526	1.0557	58.3908	58.1967	58.4262	0.9	1.1	3.288	3.288	17185.8
2186	34.8	Female	167	65.7	2046	General Population	operator	Siri	Predicted	19.9	80.1	12.688	27.972	51.205	112.887	63.8926	140.859	1372	2387	Active	60.647	1.0535	58.4806	58.5788		0.9	1.1	3.288	3.288	17185.1
1059	50.42	Male	181	71.3	1046	General Population	operator	Siri	Predicted	14.9	85.1	10.729	23.654	61.518	135.624	72.2477	159.279	1631	2463	Low Activity	67.847	1.0649	65.3163	65.1399		0.9	1.1	4.307	4.307	19194.8
1060	50.42	Male	181	71.3	1046	General Population	operator	Siri	Predicted	14.2	85.8	10.259	22.617	61.984	136.651	72.2427	159.268	1641	2478	Low Activity	67.748	1.0663	65.1985	65.0586		0.9	1.1	4.307	4.307	19194.2
1061	50.42	Male	181	71.3	1046	General Population	operator	Siri	Predicted	14.6	85.4	10.512	23.175	61.726	136.082	72.2378	159.257	1635	2469	Low Activity	67.794	1.0655	65.2619	65.0885		0.9	1.1	4.307	4.307	19193.7
1062	50.42	Male	181	71.3	1046	General Population	operator	Siri	Predicted	13.7	86.3	9.906	21.839	62.327	137.408	72.2332	159.247	1648	2488	Low Activity	67.668	1.0675	65.1147	64.9824		0.9	1.1	4.307	4.307	19193.2
1063	50.42	Male	181	71.3	1046	General Population	operator	Siri	Predicted	13.7	86.3	9.883	21.789	62.349	137.457	72.2326	159.246	1649	2490	Low Activity	67.663	1.0675	65.091	64.996		0.9	1.1	4.307	4.307	19193.1
1064	50.42	Male	181	71.3	1046	General Population	operator	Siri	Predicted	14.5	85.5	10.467	23.076	61.758	136.152	72.2246	159.228	1636	2470	Low Activity	67.773	1.0657	65.2494	65.059		0.9	1.1	4.307	4.307	19192.2
